# Alpha-synuclein targets GluN2A NMDA receptor subunit causing striatal synaptic dysfunction and visuospatial memory alteration

Valentina Durante,<sup>1</sup> Antonio de Iure,<sup>1,2</sup> Vittorio Loffredo,<sup>3,4</sup> Nishant Vaikath,<sup>5</sup> Maria De Risi,<sup>6</sup> Silvia Paciotti,<sup>7</sup> Ana Quiroga-Varela,<sup>1</sup> Davide Chiasserini,<sup>1</sup> Manuela Mellone,<sup>8</sup> Petra Mazzocchi,<sup>1</sup> Valeria Calabrese,<sup>1,2</sup> Federica Campanelli,<sup>1,9</sup> Alessandro Mechelli,<sup>1</sup> Massimiliano Di Filippo,<sup>1</sup> Veronica Ghiglieri,<sup>9,10</sup> Barbara Picconi,<sup>2,11</sup> Omar M. El-Agnaf,<sup>5</sup> Elvira De Leonibus,<sup>3,6</sup> Fabrizio Gardoni,<sup>8</sup> Alessandro Tozzi<sup>7,9</sup> and Paolo Calabresi<sup>1,9</sup>

Parkinson's disease is a progressive neurodegenerative disorder characterized by altered striatal dopaminergic signalling that leads to motor and cognitive deficits. Parkinson's disease is also characterized by abnormal presence of soluble toxic forms of  $\alpha$ -synuclein that, when clustered into Lewy bodies, represents one of the pathological hallmarks of the disease. However,  $\alpha$ -synuclein oligomers might also directly affect synaptic transmission and plasticity in Parkinson's disease models. Accordingly, by combining electrophysiological, optogenetic, immunofluorescence, molecular and behavioural analyses, here we report that  $\alpha$ -synuclein reduces N-methyl-D-aspartate (NMDA) receptor-mediated synaptic currents and impairs corticostriatal long-term potentiation of striatal spiny projection neurons, of both direct (D1-positive) and indirect (putative D2-positive) pathways. Intrastriatal injections of  $\alpha$ -synuclein produce deficits in visuospatial learning associated with reduced function of GluN2A NMDA receptor subunit indicating that this protein selectively targets this subunit both *in vitro* and *ex vivo*. Interestingly, this effect is observed in spiny projection neurons activated by optical stimulation of either cortical or thalamic glutamatergic afferents. We also found that treatment of striatal slices with antibodies targeting  $\alpha$ -synuclein prevents the  $\alpha$ -synuclein-induced loss of long-term potentiation and the reduced synaptic localization of GluN2A NMDA receptor subunit suggesting that this strategy might counteract synaptic dysfunction occurring in Parkinson's disease.

- 1 Neurological Clinic, Department of Medicine, Hospital Santa Maria della Misericordia, University of Perugia, Perugia, Italy
- 2 Laboratory of Experimental Neurophysiology, IRCCS San Raffaele Pisana, Rome, Italy
- 3 Institute of Cellular Biology and Neurobiology, National Research Council, Monterotondo (Rome), Italy
- 4 PhD Program in Behavioral Neuroscience, Sapienza University of Rome, Italy
- 5 Neurological Disorders Research Center, Qatar Biomedical Research Institute (QBRI), Hamad Bin Khalifa University (HBKU), Qatar Foundation, Doha, Qatar
- 6 Telethon Institute of Genetics and Medicine, Telethon Foundation, Pozzuoli (NA), Italy
- 7 Department of Experimental Medicine, Section of Physiology and Biochemistry, University of Perugia, Perugia, Italy
- 8 Department of Pharmacological and Biomolecular Sciences, University of Milan, Italy
- 9 Laboratory of Neurophysiology, Santa Lucia Foundation, IRCCS, Rome, Italy
- 10 Department of Philosophy, Human, Social and Educational Sciences, University of Perugia, Perugia, Italy
- 11 University of San Raffaele, Rome, Italy

**Keywords:** dopamine; glutamate; long-term potentiation; monoclonal antibodies; Parkinson's disease

**Abbreviations:**  $\alpha$ -syn = alpha-synuclein; DO = displaced object; EPSC = excitatory post-synaptic current; HFS = high-frequency stimulation; LTD = long-term depression; LTP = long-term potentiation; NDO = non-displaced object; NMDA = N-methyl-D-aspartate; NSO = non-substituted object; PFF = preformed fibrils; SO = substituted object; SPNs = spiny projection neurons

## Introduction

Alpha-synuclein ( $\alpha$ -syn) is a 140 amino acid presynaptic protein causally involved in the pathogenesis of Parkinson's disease (Spillantini and Goedert, 2016). The main mechanisms of  $\alpha$ -syn-mediated cellular damage involve mitochondrial function, endoplasmic reticulum-Golgi trafficking, calcium ions influx through formation of pore-like structures, protein degradation and oxidative stress (Gallegos *et al.*, 2015; Wong and Krainc, 2017).

The protein exists as an unstructured monomer widely distributed in the CNS and is involved in the regulation of presynaptic vesicle pool, neurotransmitter release, synaptic function and plasticity (Abeliovich *et al.*, 2000; Cabin *et al.*, 2002). However,  $\alpha$ -syn monomers have the intrinsic tendency to aggregate in structures of higher molecular weights (Gallegos *et al.*, 2015) and in particular conditions, such as pH variations, oxidative stress, mutations and over-expression of the SNCA gene. This process can lead to the formation of  $\alpha$ -syn oligomers, protofibrils and eventually fibrils, the main components of Lewy bodies (Spillantini *et al.*, 1997; Wong and Krainc, 2017). While Lewy bodies represent a neuropathological hallmark of Parkinson's disease and the histological sign of synucleinopathies, they show no actual direct neurotoxic properties (Tanaka *et al.*, 2004). Mechanisms mediating  $\alpha$ -syn toxicity in humans have not yet been determined; however, several studies point to  $\alpha$ -syn oligomers and to protofibrils as major players in synaptic dysfunction (Diogenes *et al.*, 2012; Rockenstein *et al.*, 2014).

The striatum, a subcortical nucleus receiving major excitatory inputs from the cortex and the thalamus (Ding *et al.*, 2008), is a brain region particularly involved in Parkinson's disease and oligomeric forms of  $\alpha$ -syn may affect synaptic transmission and long-term synaptic plasticity in this structure, leading to the motor and behavioural deficits observed in Parkinson's disease (Tozzi *et al.*, 2016).

Although in Parkinson's disease models pathological changes in synaptic plasticity have been widely reported *in vivo* as well as *in vitro* (Calabresi *et al.*, 2014), at present, no data are available on the effects of  $\alpha$ -syn on synaptic transmission and synaptic plasticity of striatal spiny projection neurons (SPNs) and their possible underlying mechanisms.

SPNs are GABAergic output neurons, which represent the large majority of the neuronal population in the striatum (Calabresi *et al.*, 2014). They express a particular N-methyl-D-aspartate (NMDA) subunit receptor composition including GluN2A and GluN2B subunits (Dunah *et al.*, 2000; Gardoni *et al.*, 2006), whose distinct activation

regulates glutamatergic inputs in striatal SPNs. In fact, the selective pharmacological modulation of these subunits differentially alters amplitude and kinetics of NMDARs responses also affecting responses to dopaminergic modulation (Jocoy *et al.*, 2011; Vastagh *et al.*, 2012). Moreover, an unbalanced GluN2A/GluN2B subunit ratio of the striatal synaptic NMDAR is a key element in the regulation of motor behaviour and synaptic plasticity in Parkinson's disease (Mellone *et al.*, 2015).

For this reason, it is of great importance to assess whether  $\alpha$ -syn could alter synaptic transmission and plasticity in striatal SPNs by interfering with different NMDAR subunits.

In the present study, by utilizing a multidisciplinary approach including electrophysiological, optogenetic, immunofluorescence and molecular techniques as well as behavioural testing, we have determined the pathological effects of  $\alpha$ -syn on the striatal network controlled by NMDAR subunits.

Finally, we have provided the first proof of concept evidence that antibodies against  $\alpha$ -syn can prevent these pathological synaptic dysfunctions.

## Materials and methods

All experimental procedures were conducted in conformity with the European Directive 2010/63/EU, in accordance with protocols approved by the Animal Care and Use Committee at the University of Perugia (Perugia, Italy) and IRCCS Fondazione Santa Lucia (Rome, Italy).

## Animals

For electrophysiological and behavioural experiments we used 2–3-month-old male Wistar rats (Charles River); 2-month-old transgenic male BAC *Drd1a*-tdTomato mice containing a mouse *Drd1a* promoter directing the expression of a modified DsRed fluorescent protein [B6.Cg-Tg(*Drd1a*-tdTomato)6Calak/J, tdTomato, The Jackson Laboratory] and B6.Cg-Tg(Thy1-COP4/EYFP)18Gfng/J transgenic mice (Thy1-ChR2-YFP) expressing the light-activated ion channel Channelrhodopsin-2 (ChR2) fused to yellow fluorescent protein under the control of the mouse thymus cell antigen 1 (*Thy1*) promoter. Selective expression of ChR2 has been demonstrated both in cortical neurons of layer V and thalamic neurons (Arenkiel *et al.*, 2007; Lim *et al.*, 2012).

Animals were housed at 23°C room temperature with food and water *ad libitum* and a 12-h light-dark cycle. All efforts were made to minimize the number of animals used and their suffering.

## Electrophysiology

Coronal brain slices including the cortex and the striatum were cut from Wistar rats and tdTomato mice using a vibratome at 220–240  $\mu\text{m}$  thickness. To better preserve the connectivity of thalamic fibres to the striatum, parahorizontal slices (250  $\mu\text{m}$ ) were cut from Thy1-ChR2-YFP mice for optogenetic experiments (Smeal *et al.*, 2007; Ding *et al.*, 2008; Sciamanna *et al.*, 2012). Slices were maintained in a Krebs solution, bubbled with a 95%  $\text{O}_2$ –5%  $\text{CO}_2$  gas mixture at room temperature containing (in mM): 126 NaCl, 2.5 KCl, 1.2  $\text{MgCl}_2$ , 1.2  $\text{NaH}_2\text{PO}_4$ , 2.4  $\text{CaCl}_2$ , 10 glucose, and 25  $\text{NaHCO}_3$  (Calabresi *et al.*, 1992b). Single slices were transferred to a recording chamber and submerged in a continuously flowing Krebs (34°C; 2.5–3 ml/min) bubbled with a 95%  $\text{O}_2$ –5%  $\text{CO}_2$  gas mixture. The internal solution for patch-clamp recordings contained (in mM): 145  $\text{K}^+$ -gluconate, 0.1  $\text{CaCl}_2$ , 2  $\text{MgCl}_2$ , 0.1 EGTA, 10 HEPES, 0.3 Na-GTP and 2 Mg-ATP, adjusted to pH 7.3 with KOH. For recording NMDAR-mediated currents, neurons were held at +40 mV membrane holding potential and the internal solution contained (in mM): 120 CsMeSO<sub>3</sub>, 10 CsCl, 8 NaCl, 2  $\text{MgCl}_2$ , 10 HEPES, 0.2 EGTA, 10 TEA, 5 QX314, 0.3 Na-GTP and 2 Mg-ATP, adjusted to pH 7.3 with CsOH. Only neurons identified as striatal SPNs were considered for the experiments. Normally, for each animal we obtained two to three experiments. SPNs were identified by their hyperpolarized resting membrane potential ( $\sim -80$  mV), absence of spontaneous action potential discharge and presence of tonic firing activity during current-induced membrane depolarization. Signals were amplified with a Multiclamp 700B amplifier (Molecular Devices), recorded and stored on PC using pClamp10. Whole-cell voltage-clamp recordings (access resistance 15–30 M $\Omega$ ; holding potential  $-80$  mV) were performed with borosilicate pipettes (4–7 M $\Omega$ ) filled with the standard internal solution. A bipolar electrode, connected to a stimulation unit (Grass Telefactor), was located in the white matter between the cortex and the striatum to stimulate glutamatergic fibres (0.1 Hz) and evoke excitatory post-synaptic currents (EPSCs), while the recording electrode was placed in the dorsolateral striatum. In all patch-clamp experiments, 50  $\mu\text{M}$  picrotoxin was added to the external medium to block GABA<sub>A</sub> receptors. To induce long-term potentiation (LTP) or long-term depression (LTD), a high frequency stimulation (HFS) protocol consisting of three trains of 3 s (20 s interval) was delivered at 100 Hz. During HFS protocol, the stimulus intensity was increased to supra-threshold levels. External  $\text{Mg}^{2+}$  ions were omitted to maximize the contribution of NMDARs during LTP experiments (Calabresi *et al.*, 1992b). The AMPA receptor (AMPA)- and NMDAR-mediated synaptic currents (AMPA-EPSCs and NMDA-EPSCs) were recorded in pharmacological isolation, with 50  $\mu\text{M}$  picrotoxin plus 50  $\mu\text{M}$  APV and 50  $\mu\text{M}$  picrotoxin plus 10  $\mu\text{M}$  CNQX, respectively. AMPAR rectification index was obtained by dividing the AMPA-EPSC amplitude measured at +40 mV by the one measured at  $-80$  mV. NMDA/AMPA ratios were calculated by dividing the NMDA-EPSC positive peak amplitude, acquired at +40 mV holding potential in the presence of 50  $\mu\text{M}$  picrotoxin plus 10  $\mu\text{M}$  CNQX, by the EPSC negative peak amplitude acquired at  $-80$  mV in picrotoxin.

## Optogenetic

Optical stimulation of cortex or thalamus was performed using an infinity cube (Cairn Research), consisting of a 470 nm filter system mounted on an Olympus BX-51WI microscope and controlled by an OptoFlash<sup>TM</sup> (Cairn Research) LED light switch. The experiments were performed on Thy1-ChR2-YFP mice. Light power at microscope objective exit was 2–30 mW/mm<sup>2</sup>. Spotlight was made by placing a diaphragm along the light path. Slices were illuminated from the top and a round spot was created with a radius of  $\sim 500$ –600  $\mu\text{m}$  to avoid light spread to unwanted brain structures and delivered on the cortex or the thalamus. A 3-ms light pulse was delivered every 15 s on cortical layer V or in the thalamus to evoke EPSCs in SPNs.

## Preparation of $\alpha$ -synuclein in Krebs solution

Different concentrations of  $\alpha$ -syn cocktail (3, 10, 30 and 300 nM) (referred to as  $\alpha$ -syn OLIGO) were prepared in Krebs solution bubbled with a 95%  $\text{O}_2$ –5%  $\text{CO}_2$  gas mixture at room temperature. The solutions were incubated for up to 1 h, taking aliquots at different time points.

## $\alpha$ -Synuclein preformed fibrils preparation

Lyophilized fresh monomeric  $\alpha$ -syn (0.33 mg) (recombinant human  $\alpha$ -syn) was dissolved in sterile phosphate-buffered saline (PBS) to a final concentration of 1 mg/ml ( $\approx 70$   $\mu\text{M}$ ).  $\alpha$ -Syn-containing buffer (300  $\mu\text{l}$ ) was incubated for seven consecutive days at 37°C on a shaker (300 rpm) in a sterile 96-well plate. At the end of this procedure the  $\alpha$ -syn preformed fibril (PFF) aliquots were stored at  $-80^\circ\text{C}$  until use for intra-brain injection.

## Transmission electron microscopy

The samples (5  $\mu\text{l}$ ) were deposited on a glow-discharged Formvar/Carbon on 300 mesh-coated copper grid (Agar Scientific) for 2 min, blotted with Whatman filter paper and negatively stained with 2% uranyl acetate for a few seconds. Grids were examined with an energy filtering TEM LEO 912 AB (Zeiss) operating at 100 kV and digital images were acquired using a CCD camera (Proscan) 1kx1k with the iTEM software (Olympus).

## Detection of $\alpha$ -synuclein oligomers in the Krebs solution

A 384-well ELISA microplate (Nunc MaxiSorb, Nunc) was coated by overnight incubation at 4°C with SynO2 antibody (0.2  $\mu\text{g}/\text{ml}$ ) in 200 mM  $\text{NaHCO}_3$ , pH 9.6 (50  $\mu\text{l}/\text{well}$ ). The plate was then washed with PBST and incubated with 100  $\mu\text{l}/\text{well}$  of blocking buffer for 2 h at 37°C. After washing, 50  $\mu\text{l}$  of the samples (1 nM) was added to each well, and plates were incubated at 37°C for 2.5 h. FL-140 (rabbit polyclonal antibody, Santa Cruz Biotechnology), diluted in blocking buffer at 1:1000, was added to the appropriate wells, and

incubated at 37°C for 2 h. Next, the plate was washed and incubated for 2 h at 37°C with 50 µl/well of goat anti-rabbit IgG HRP (Jackson ImmunoResearch) diluted in blocking buffer (1:15 000). After washing, the plate was incubated with 50 µl/well of an enhanced chemiluminescent substrate (SuperSignal ELISA Femto, Pierce Biotechnology). The chemiluminescence, expressed in relative light units, was immediately measured using VICTOR™ X3 multilabel plate reader (PerkinElmer).

## Thioflavin T binding assay

The formation of  $\alpha$ -syn oligomers was confirmed by Thioflavin T (ThT) binding assay (Nilsson, 2004). ThT was incubated at a final concentration of 20 µM in different  $\alpha$ -syn solutions (30 nM and 300 nM, respectively) collected at T0 and after 60 min of incubation in Krebs solution bubbled with a 95% O<sub>2</sub>–5% CO<sub>2</sub> gas mixture at room temperature. Emission wavelength scan was performed with an excitation wavelength of 450 nm using a plate reader (BMG Labtech Clariostar). The assay was performed in triplicate.

## Immunoprecipitation of $\alpha$ -synuclein oligomers formed in Krebs solution

Five hundred microlitres of the samples collected at time points 0 and 30 min were incubated with 0.043 and  $4.3 \times 10^{-5}$  µg/ml of either SynO2 or Syn211 antibodies for 2 h at room temperature. Protein G beads (100 µl) were added and incubated for 1 h at room temperature. The samples were centrifuged and the supernatants were collected and checked for the presence of  $\alpha$ -syn oligomers by ELISA. The bound  $\alpha$ -syn oligomers from the beads were eluted by adding 50 µl of 0.2 M glycine pH 2.5 and immediately neutralized with 5 µl of 1 M Tris pH 8.0 and taken for western blot analysis.

## Subcellular fractionation

For the extraction of Triton-insoluble postsynaptic fraction (TIF), striatal areas were carefully isolated and collected on dry ice from control slices and slices treated with  $\alpha$ -syn alone (30 nM) and with antibodies against  $\alpha$ -syn (Syn211 and SynO2). Striatal areas were then homogenized with a Teflon-glass potter in ice-cold buffer containing (in mM) 320 sucrose, 1 HEPES, 1 MgCl<sub>2</sub>, 1 NaHCO<sub>3</sub>, 0.1 phenylmethylsulphonylfluoride at pH 7.4 in the presence of Complete™ Protease Inhibitor Cocktail Tablets (Roche Diagnostics) and phosSTOP™ Phosphatase Inhibitor (Roche Diagnostics). The sample was spun at 13 000g for 15 min at 4°C. The resulting pellet was resuspended in Triton-KCl buffer (0.5% Triton™ X-100 and 150 mM KCl) and, after 15 min incubation on ice, it was spun further at 100 000g for 1 h at 4°C. The pellet (TIF) was resuspended in 20 mM HEPES buffer supplemented with Complete™ Protease Inhibitor Cocktail tablets and stored at –80°C.

## Western blotting

The levels of NMDARs and AMPARs in the TIF were analysed by western blotting. TIF samples were separated onto a 7% acrylamide/bisacrylamide gel. Proteins were blotted onto a

nitrocellulose membrane (Bio-Rad) and probed with the appropriate primary antibodies followed by the corresponding HRP-conjugated secondary antibodies. Labelling detection was performed with ChemiDoc™ MP Imaging System (Bio-Rad) and images were acquired with ImageLab software (Bio-Rad). The primary antibodies used in this study are anti-GluN2A 1:500 (Sigma-Aldrich), anti-GluN2B 1:500 (Neuromab), anti-GluA1 1:1000 (Neuromab), anti-GluA2 1:500 (Neuromab) and anti-tubulin 1:20 000 (Sigma-Aldrich). The latter was always used as loading control for normalization.

## Immunolabelling

Primary antibodies of hu- $\alpha$ -Syn (1:1000, sc-12767, Santa Cruz Biotechnology) in combination with hu- $\alpha$ -Syn phosphorylated on Ser129 (hu- $\alpha$ -Syn-phospho S129, ab51253; Abcam) or in combination with tyrosine hydroxylase (TH 1:500, AB152; Merck Millipore) were used. Coronal slices (30 µm), obtained with the use of a vibratome (Leica VT1000 S), were incubated overnight at 4°C with a PBS solution containing bovine serum albumin (BSA) 0.1% and the combination of two primary antibodies. After rinsing in PBS, the sections were incubated for 2 h with a mixture of secondary antibodies: goat anti-rabbit Alexa Fluor® 647, goat anti-mouse Alexa Fluor® 488 (1:300; AP187SA6 and AP124JA, Merck Millipore). After subsequent washes in PBS, brain slices were incubated with DAPI (S7113; Merck Millipore) for 10 min and finally mounted on gelatin-coated slides and coverslipped. The specificity of the immunoreaction was controlled by omitting primary antibodies. Images of the medial and lateral striatum (60× magnification) were taken using a fully motorized confocal microscope Nikon A1 and Nikon NIS Elements Advanced Research software.

## Surgery

A total of 30 male Wistar rats (Charles River) were housed three per cage with free access to chow and water under a 12:12 h light-dark cycle. All surgical operations were performed under ketamine/xylazine anaesthesia. Animals received two bilateral intrastriatal injections of either  $\alpha$ -syn PFF ( $n = 9$ ), OLIGO ( $n = 6$ ) or PBS (control,  $n = 15$ ). The volume injected, using a 10 µl Hamilton microsyringe, was 1 µl for each site. The injection rate was 0.38 µl/min and for each site the cannula was left in place for an additional 2 min before retracting it. The coordinates, based on a previous study using these parameters to perform striatal lesions (Kirik *et al.*, 1998), were the following: (i) anteroposterior (AP) +1.0; mediolateral (ML) +3.0; dorsoventral (DV) –5.0; and (ii) AP +1.0; ML –3.0; DV –5.0. ML coordinates were taken from lambda, AP coordinates were from bregma, according to Paxinos (2005). Tooth bar was set at 0.00. After the surgery the animals were monitored until awake and then brought back to the animal facility. Six weeks after the surgery the animals were tested for motor behaviour and cognition deficit.

## Visuospatial memory task

The visuospatial memory task was a rat-adapted version of the visuospatial memory task previously described in mice (De Leonibus *et al.*, 2007, 2009; Rodo *et al.*, 2017). The test was divided into 10 sessions of 5 min each. The interval



between each session was 3 min. Briefly, during Session 1, rats were placed in an empty square open field to habituate to the context (60 × 60 cm). After this, from Session 2 to Session 7, the rats were free to explore three objects positioned in the arena to allow them to learn information about the objects and their spatial location in the arena (habituation phase). To test whether the animals learned spatial information related to the position of the objects, during the spatial test Session 8, the configuration of the objects was changed by moving one (the displaced object, DO) and leaving the other two objects in the same positions (non-displaced objects, NDO1 and NDO2). In Session 9, the configuration of the objects was kept unchanged to let the animal habituate to the spatial change. In the last session (Session 10), to test whether animals learned information about the shape of the object, one of the familiar objects was replaced with a new one (substituted object, SO); the other two objects were left unchanged (non-substituted objects, NSO1 and NSO2). Object exploration was defined as the time in which the nose of the animal was directed toward the object (<2 cm distance). The animals' ability to selectively react to the spatial change was analysed by calculating the spatial exploration index [DO = DO (Session 8) – DO (Session 7); NDO = NDO (Session 8) – NDO (Session 7)], while the animals' ability to selectively react to the non-spatial change (novel object) was analysed by calculating non-spatial exploration index [SO = SO (Session 10) – SO (Session 9); NSO = NSO (Session 10) – NSO (Session 9)]. Basal motor activity was evaluated during Session 1, by measuring time interval changes in distance travelled (cm), immobility time (s) and maximal speed (cm/s).

## Statistical analysis

Data analysis of electrophysiological experiments was performed off-line using Clampfit10 (Molecular Devices) and GraphPad Prism 5.0 (GraphPad Software). Values in the text and figures are mean ± standard error of the mean (SEM), *n* representing the number of recorded neurons. Changes of EPSC amplitude induced by drugs or by stimulation protocols were expressed as a percentage of the baseline, the latter representing the normalized EPSC mean amplitude acquired during a stable period (10–15 min) before delivering drugs or stimulation and statistically evaluated by the Student's *t*-test for unpaired samples. LTP and LTD presence were statistically verified with the Student's *t*-test for paired samples by comparing in each experiment values of the EPSC amplitudes at 25–30 min after the application of the HFS protocol relative to the baseline. Current-voltage (I-V) curves were compared using the two-way ANOVA. The significance level was established at *P* < 0.05. For western blot experiments, significance of the differences was determined by one-way ANOVA followed by Tukey's *post hoc* test or by unpaired Student's *t*-test as appropriate. For ThT binding assay significance of the differences was determined by Student's *t*-test. For behavioural analysis, data were analysed by using two-way ANOVA for repeated measure, with treatment (two levels: control and  $\alpha$ -syn) as a between factor. Duncan *post hoc* analysis was used when appropriate.

When parametric tests were used, normality was checked with Shapiro-Wilk test and visual inspection of data distribution. The criterion for significance was set at *P* < 0.05. We used the Shapiro-Wilk test for its level of power compared

to other procedures in small sample size scenarios (Royston, 1993).

## Drugs

Picrotoxin, D-(–)-2-amino-5-phosphonopentanoic acid (APV), 6-cyano-7-nitroquinoxaline-2,3-dione disodium (CNQX), threo ifenprodil hemitartrate, 3-chloro-4-fluoro-N-[4-[[2-(phenylcarbonyl)hydrazino]carbonyl]benzyl]benzenesulfonamide (TCN-201), NVP-AAM077 were from Tocris; dopamine hydrochloride (DA) was from Sigma.

Drugs were bath-applied by switching the Krebs solution to one containing known concentrations of drugs. Drugs applied in the recording chamber were delivered for at least 10 min before recording AMPA-EPSCs and NMDA-EPSCs and maintained throughout the experiment. We used two different mouse antibodies against  $\alpha$ -syn: a monoclonal IgG1 antibody, raised against the amino acid 121–125 of human  $\alpha$ -syn, which recognizes all forms of the protein (Syn211, Santa Cruz Biotechnology, Inc.) (El-Agnaf *et al.*, 2003) and a monoclonal IgG1 antibody, which has a higher affinity for oligomers than  $\alpha$ -syn fibrils (SynO2) (Vaikath *et al.*, 2015). Antibodies and  $\alpha$ -syn were provided by Prof. O. El-Agnaf (United Arab Emirates University, UAE). Corticostriatal slices were incubated in a solution containing 8.6  $\mu$ g  $\alpha$ -syn, corresponding to a dose of 30 nM, plus the antibody for 1 h (1:1,  $\mu$ g/ $\mu$ g). The Syn211 antibody was further diluted 1:10 (0.043  $\mu$ g/ml) and 1:100 (0.0043  $\mu$ g/ml), while the SynO2 antibody was used at dilution 1:10 000 ( $4.3 \times 10^{-5}$   $\mu$ g/ml).

## Data availability

The data that support the findings of this study are available from the corresponding author, upon reasonable request.

## Results

### $\alpha$ -Synuclein does not affect basal membrane properties and LTD but impairs LTP in striatal spiny projection neurons

To characterize the  $\alpha$ -syn effect on striatal SPNs we first explored the effect of this protein on the basal membrane properties performing patch-clamp recordings of SPNs in striatal slices obtained from 2–3-month-old rats. The current-voltage relationship was evaluated by applying hyperpolarizing and depolarizing steps of currents to SPNs of control slices and of slices incubated for 1 h with 30 nM monomeric/oligomeric  $\alpha$ -syn freshly diluted in the Krebs solution (see 'Materials and methods' section). We found that the measured electrical properties were unaffected by  $\alpha$ -syn since statistical analysis showed no significant differences in the I-V curves between SPNs recorded in control slices (*n* = 5) and in slices treated with  $\alpha$ -syn (*n* = 4) (control versus  $\alpha$ -syn, *P* > 0.05) (Fig. 1A). Striatal slices were subsequently tested to assess the effect of 30 nM  $\alpha$ -syn on long-term changes of synaptic transmission (LTD and LTP) of

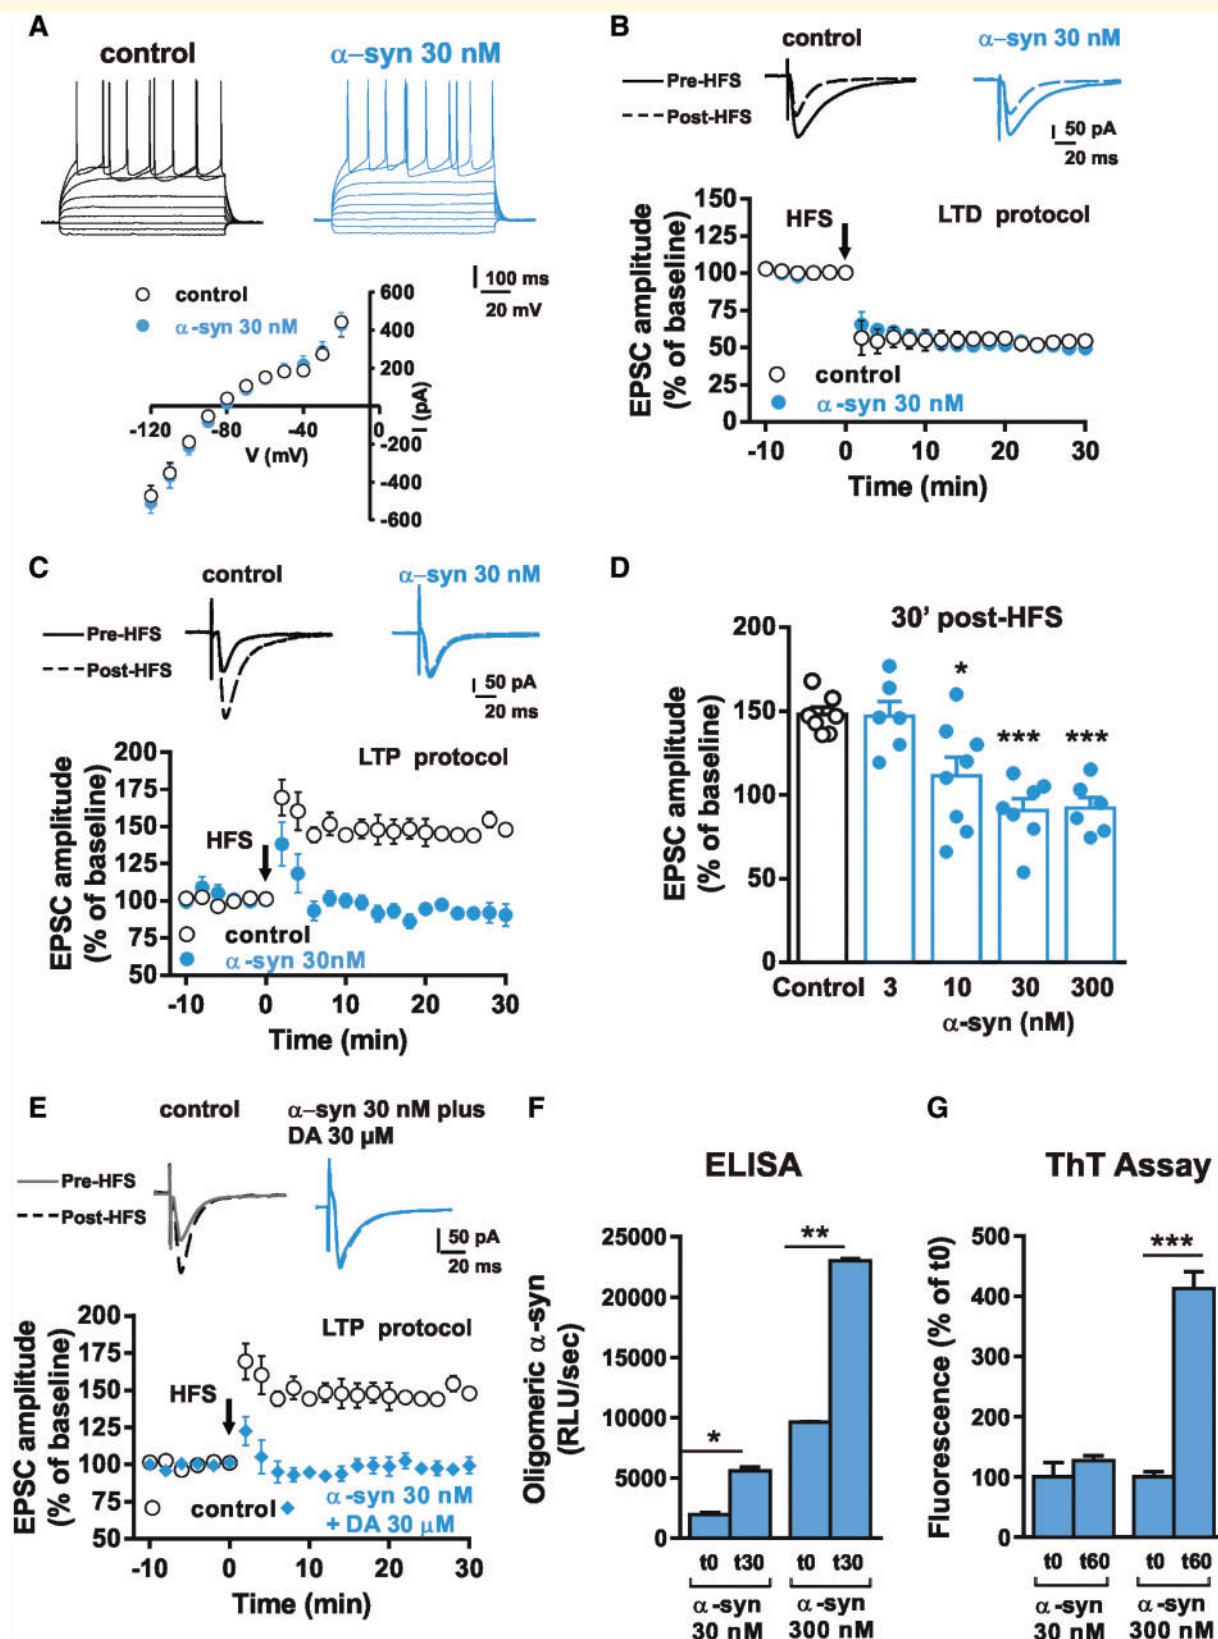

**Figure 1** Effect of  $\alpha$ -syn on the intrinsic membrane properties and synaptic plasticity of striatal SPNs. (A) Representative voltage traces (top) and current-voltage graph (bottom) recorded from SPNs during the injection of hyperpolarizing and depolarizing steps of current in control conditions ( $n = 5$ ) and in the presence of 30 nM  $\alpha$ -syn ( $n = 4$ ) show no differences in the firing pattern discharge and intrinsic membrane properties of these neurons. (B) Example traces (top) and time course (bottom) of the EPSCs measured before and 30 min after the application of the HFS protocol show no differences in the LTD induction in SPNs recorded from control slices ( $n = 6$ ) and from slices incubated with  $\alpha$ -syn ( $n = 6$ ).

(continued)

SPNs. EPSCs were recorded for 10 min to obtain a stable baseline and then for 30 min after the application of the HFS protocol. We found that SPNs recorded in control and in  $\alpha$ -syn-incubated slices showed LTD of similar amplitudes (Calabresi *et al.*, 1992a). In fact, the EPSCs amplitude was reduced by  $46.0 \pm 2.8\%$  ( $n = 6$ ) and by  $49.8 \pm 2.1\%$  ( $n = 6$ ) in SPNs from control slices and  $\alpha$ -syn-incubated slices, respectively [ $t(10) = 1.094$ ,  $P < 0.05$ , pre versus 30 min after HFS; Fig. 1B]. To explore the effect of  $\alpha$ -syn on SPNs LTP, EPSCs were recorded before and for 30 min after application of the magnesium-free HFS protocol. While SPNs from control slices showed a robust LTP of  $148.7 \pm 3.2\%$  [ $n = 7$ ,  $t(6) = 15.37$ ,  $P < 0.001$ ], neurons from  $\alpha$ -syn-treated slices showed no LTP ( $n = 7$ ,  $P > 0.05$ , pre versus 30 min after HFS; Fig. 1C).

We also analysed the EPSC amplitude measured 30 min after the induction of the LTP, in the presence of different concentrations of  $\alpha$ -syn. We found that while 3 nM  $\alpha$ -syn ( $n = 6$ ) did not affect this parameter, both 10 nM ( $n = 7$ ) and 30 nM ( $n = 7$ ) produced a significant reduction. Higher concentrations of  $\alpha$ -syn (300 nM,  $n = 6$ ) did not decrease the EPSC amplitude further (Fig. 1D).

It has been postulated that a major detrimental effect of  $\alpha$ -syn is the reduction of striatal dopamine levels (Ghiglieri *et al.*, 2018), thus the  $\alpha$ -syn-induced LTP impairment could be induced by lower dopamine levels in the synaptic cleft. To test this hypothesis, 30  $\mu$ M exogenous dopamine was bath-applied before the HFS to obtain a recovery of the LTP in the presence of  $\alpha$ -syn ( $n = 6$ ). Surprisingly, dopamine failed to restore this form of synaptic plasticity suggesting that other non-dopaminergic mechanisms may be involved in the loss of LTP in the presence of  $\alpha$ -syn (Fig. 1E).

To investigate the time- and dose-dependent formation of  $\alpha$ -syn oligomers in the Krebs solution used for the electrophysiological experiments,  $\alpha$ -syn samples at T 0 and 30 min were taken and measured by specific oligomeric ELISA. As expected, the formation of  $\alpha$ -syn oligomers was time- and dose-dependent (Fig. 1F;  $*P < 0.05$ ,  $**P < 0.01$ ), as higher levels of  $\alpha$ -syn oligomers were detected in the 300 nM  $\alpha$ -syn samples collected at 30 min. To evaluate the presence of fibrils we used the ThT fluorescence assay; the results clearly show that little fluorescence was detected with the

30 nM concentration, independent of the timing of sampling (Fig. 1G;  $***P < 0.001$ ).

## $\alpha$ -Synuclein affects spiny projection neuron glutamatergic transmission by selectively targeting the GluN2A-NMDAR current

We then evaluated the effect of  $\alpha$ -syn on the AMPA- and NMDA-EPSCs since both these glutamate receptors exert a pivotal role on the long-term changes of synaptic plasticity of SPNs. To isolate AMPA-EPSCs, SPNs were recorded in the presence of 50  $\mu$ M of the NMDAR antagonist APV and 50  $\mu$ M of the GABA<sub>A</sub>R antagonist picrotoxin. After obtaining stable EPSCs for 10 min, synaptic currents were measured in the presence of 30 nM  $\alpha$ -syn for an additional 10 min. We found no significant difference between AMPA-EPSCs recorded before and following  $\alpha$ -syn application ( $n = 6$ ,  $P > 0.05$ ; Fig. 2A). We also evaluated the AMPAR rectification index calculated in control conditions and in the presence of 30 nM  $\alpha$ -syn (Fig. 2C). Statistical analysis showed that in these conditions the AMPA rectification index was not significantly different from that measured before  $\alpha$ -syn application ( $n = 6$ ,  $P > 0.05$ ; Fig. 2C), further suggesting that in SPNs  $\alpha$ -syn does not alter the function of AMPAR.

We also explored whether  $\alpha$ -syn affected the NMDAR by targeting the GluN2A- or the GluN2B-mediated NMDA-EPSC (GluN2A-EPSC and GluN2B-EPSC). To isolate the GluN2A-EPSC, synaptic responses were recorded in the presence of 10  $\mu$ M of the AMPAR antagonist CNQX, 50  $\mu$ M picrotoxin and 3  $\mu$ M of the GluN2B antagonist ifenprodil. We found that after recording a stable baseline for 10 min, the subsequent application of 30 nM  $\alpha$ -syn significantly reduced the GluN2A-EPSC by  $40.8 \pm 6.1\%$  [ $n = 6$ ,  $t(5) = 6.684$ ,  $P < 0.05$ ; Fig. 2B]. We subsequently isolated the GluN2B-EPSC by recording synaptic responses in the presence of CNQX, 50 nM of the GluN2A antagonist NVP-AAM077 and picrotoxin. The application of 30 nM  $\alpha$ -syn did not affect the GluN2B-EPSC ( $n = 6$ ,  $P > 0.05$ ; Fig. 2D). Similarly, we found that the GluN2B-EPSC, isolated using the more specific GluN2A antagonist TCN-201 (10  $\mu$ M), was not significantly affected by  $\alpha$ -syn application

### Figure 1 Continued

(C) Paired EPSC traces (top) and time-course graph of the EPSC amplitude (bottom) recorded in SPNs from control slices ( $n = 7$ ) and in SPNs of slices incubated with 30 nM  $\alpha$ -syn ( $n = 7$ ) before and after the delivery of the HFS protocol show the block of LTP in SPNs recorded from slices treated with  $\alpha$ -syn. (D) Histogram showing the EPSC amplitude 30 min following the HFS protocol of SPNs recorded from control striatal slices and from slices incubated with increasing concentrations of  $\alpha$ -syn (3 nM  $n = 6$ , 10 nM  $n = 7$ , 300 nM  $n = 6$ ). (E) EPSC traces (top) and time-course graph of the EPSC amplitude (bottom) measured in SPNs of control slices ( $n = 7$ ) and of slices incubated with 30 nM  $\alpha$ -syn in the presence of 30  $\mu$ M dopamine (DA) ( $n = 6$ ) bath-applied before and after the HFS protocol. Data are represented as mean  $\pm$  SEM. (F) Histogram of the ELISA shows time- and dose-dependent  $\alpha$ -syn oligomers; higher levels of  $\alpha$ -syn oligomers were detected in the 300 nM  $\alpha$ -syn samples collected at 30 min. (G) ThT assay shows that little fluorescence was detected with the 30 nM concentration, independently on the timing of sampling. In contrast, HFS was measurable with the 300 nM dose. Data are reported as percentage of fluorescence registered at T0  $\pm$  SEM.  $*P < 0.05$ ,  $**P < 0.01$ ,  $***P < 0.001$ .



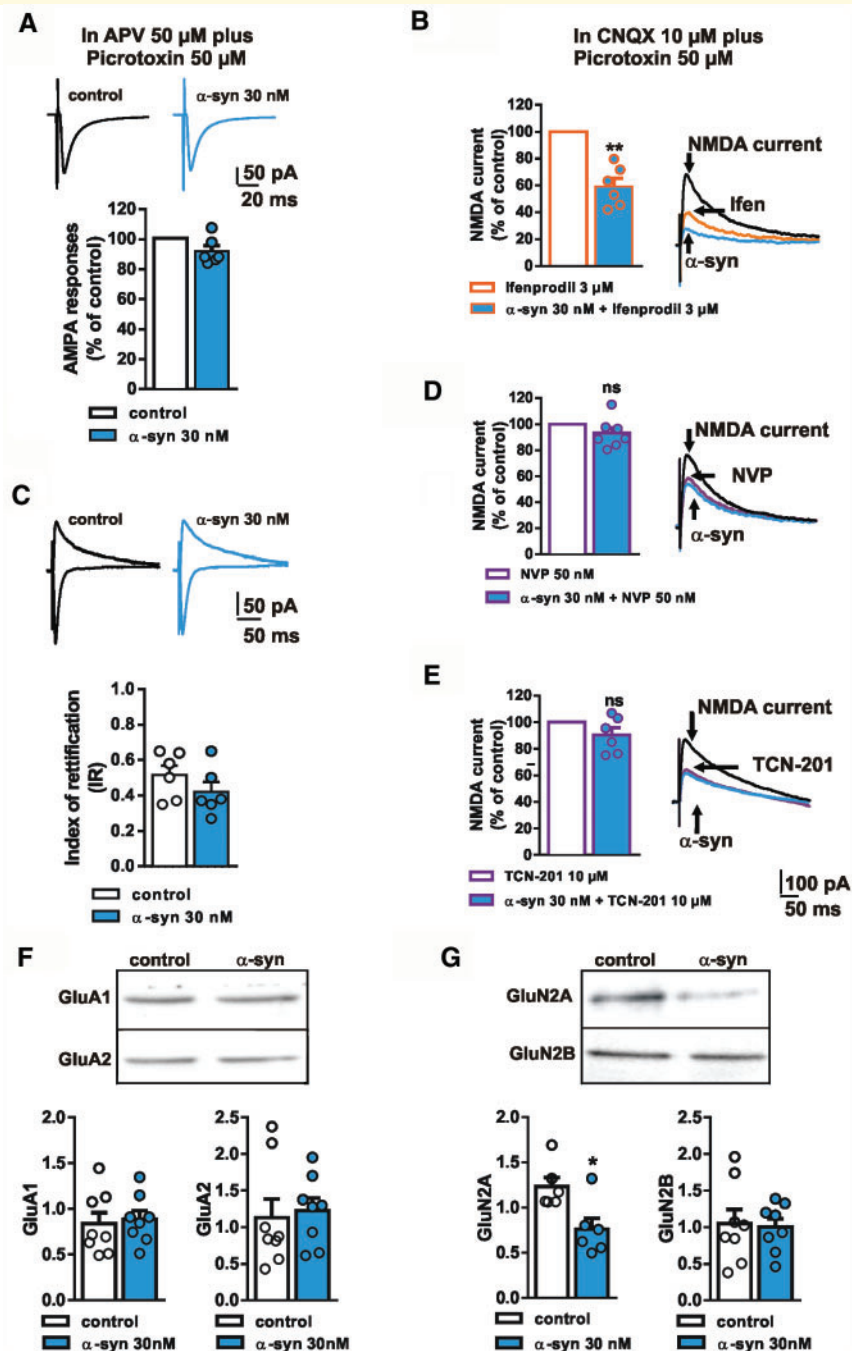

**Figure 2** Effect of  $\alpha$ -syn on AMPAR- and NMDAR-mediated currents. (A) Example traces (top) and histogram (bottom) showing the AMPAR-mediated synaptic current of SPNs recorded in pharmacological isolation, in the presence of APV and picrotoxin, before and after the application of 30 nM  $\alpha$ -syn ( $n = 6$ ). (B) Histogram showing the averaged EPSC amplitude carried by the GluN2A-expressing NMDAR measured in SPNs in the presence of picrotoxin, CNQX and ifenprodil (open orange bar) and after subsequent addition of 30 nM  $\alpha$ -syn ( $n = 6$ ) (filled cyan bar). The superimposed traces show EPSCs acquired at +40 mV holding potential of a SPN in the presence of picrotoxin + CNQX (black trace), picrotoxin + CNQX + ifenprodil (orange trace) and picrotoxin + CNQX + ifenprodil +  $\alpha$ -syn (cyan trace). (C) Example traces of EPSCs (top) evoked at +40 and -80 mV holding potential and histogram (bottom) showing the AMPAR reactivation index of SPNs recorded in control conditions and in the presence of  $\alpha$ -syn ( $n = 6$ ). (D and E) Histograms showing the averaged EPSC amplitudes carried by the GluN2B-expressing NMDAR measured in SPNs in the presence of picrotoxin, CNQX and NVP-AAM077 ( $n = 6$ ) (D, open purple bar) or picrotoxin, CNQX and TCN-201 ( $n = 6$ ) (E, open purple bar) and in the presence of 30 nM  $\alpha$ -syn at this current ( $n = 6$ ) (D and E, filled cyan bars). Superimposed traces showing EPSCs acquired from a single SPN following the application of picrotoxin + CNQX (D, black trace), picrotoxin + CNQX + NVP-AAM077 (D, purple trace), picrotoxin + CNQX + NVP-AAM077 +  $\alpha$ -syn (D, cyan trace) or picrotoxin + CNQX (E, black trace), picrotoxin + CNQX + TCN-201 (E, purple trace), picrotoxin + CNQX + TCN-201 +  $\alpha$ -syn (E, cyan trace). (F and G) Representative western blot images and histograms showing the effects of incubation (1 h) of corticostriatal slices with 30 nM  $\alpha$ -syn on the synaptic localization of GluA1 and GluA2 AMPAR subunits ( $n = 8$ ) (F) and GluN2A and GluN2B NMDAR subunits ( $n = 6$ ) (G). Data are normalized against tubulin and are shown in the graph as mean  $\pm$  SEM. \* $P < 0.05$ , \*\* $P < 0.01$ . ns = not significant.



( $n = 6$ ,  $P > 0.05$ ; Fig. 2E). Taken together these findings show that  $\alpha$ -syn affects the SPNs NMDA-EPSC selectively targeting the GluN2A-containing NMDA receptors. Moreover, we also evaluated, by western blotting analysis in a Triton-insoluble post-synaptic fraction (TIF), the possibility that alterations in the molecular composition of ionotropic glutamate receptors may lead to the observed synaptic alterations in SPNs induced by  $\alpha$ -syn. In line with the electrophysiological experiments, we found that incubation (1 h) of the slices in 30 nM  $\alpha$ -syn did not alter GluA1 and GluA2 AMPAR subunit synaptic levels ( $n = 8$ ,  $P > 0.05$ ,  $\alpha$ -syn versus control; Fig. 2F) while it significantly reduced the GluN2A but not GluN2B NMDAR subunit synaptic levels ( $n = 6$ , GluN2A,  $P = 0.014$ ,  $\alpha$ -syn versus control; Fig. 2G).

### GluN2A but not the GluN2B NMDAR subunit plays a critical role in the induction of LTP in spiny projection neurons

To ascertain the involvement of GluN2A and GluN2B NMDAR subunits in LTP, we first induced this form of synaptic plasticity in the presence of 3  $\mu$ M of the GluN2B antagonist ifenprodil, to isolate the GluN2A-EPSC. In these conditions we found a normal LTP since the increase of EPSCs amplitude obtained after the delivery of HFS protocol was not different from that of the control slices (control,  $147.2 \pm 3.0\%$ ,  $n = 6$ ; ifenprodil,  $143.3 \pm 2.8\%$ ,  $n = 5$ ,  $P > 0.05$ ; Supplementary Fig. 1). Conversely, the application of the GluN2A antagonists NVP-AAM077 (50 nM,  $n = 5$ ) or TCN-201 (10  $\mu$ M,  $n = 5$ ) completely prevented the LTP induction ( $P > 0.05$ ; Supplementary Fig. 1), further confirming that the NMDAR expressing the GluN2A subunit mediates the LTP induction of striatal SPNs.

### $\alpha$ -Synuclein affects LTP and NMDAR-mediated synaptic currents in spiny projection neurons of both direct and indirect pathways

To investigate whether SPNs expressing either the D1-like or D2-like dopamine receptors (Calabresi *et al.*, 2014) were differentially affected by  $\alpha$ -syn, we recorded SPNs from striatal slices of dtTomato mice. In these animals, we first optically identified fluorescent (D1-like expressing: D1R-positive) and non-fluorescent (putative D2-like expressing: putative D2R-positive) SPNs (Fig. 3A). Subsequently, we patch-clamped SPNs for an electrophysiological characterization and for LTP analysis in both these neuronal subpopulations. We found that both fluorescent (D1R-positive) and non-fluorescent (putative D2R-positive) SPNs showed LTP of similar amplitude. In fact, 30 min after the induction of the HFS protocol, the EPSC amplitude was increased with respect to the baseline by  $134.6 \pm 4.0\%$

[ $n = 6$ ,  $t(5) = 11.33$ ,  $P < 0.001$ ] and  $137.1 \pm 5.9\%$  [ $n = 6$ ,  $t(5) = 5.452$ ,  $P < 0.001$ ] in fluorescent and non-fluorescent SPNs, respectively (Fig. 3B).

Moreover, we aimed to verify whether  $\alpha$ -syn equally affected LTP of SPNs of both neuronal subpopulations. Striatal slices from dtTomato mice were incubated for 1 h with 30 nM  $\alpha$ -syn. In these conditions we found that the induction of LTP was completely prevented in both fluorescent ( $n = 5$ ,  $P > 0.05$ ) and non-fluorescent SPNs ( $n = 5$ ,  $P > 0.05$ ) (Fig. 3C and D).

Since  $\alpha$ -syn affected NMDA-EPSCs (Fig. 2C–E), we tested whether this glutamatergic current was differentially altered by  $\alpha$ -syn in SPNs expressing and not expressing (putative D2R-positive) the D1 dopamine receptor. The NMDA-EPSC amplitudes were recorded in pharmacological isolation in the presence of 50  $\mu$ M picrotoxin plus 10  $\mu$ M CNQX in both fluorescent and non-fluorescent SPNs of dtTomato mice. After acquiring a stable baseline for 10 min, 30 nM  $\alpha$ -syn was bath-applied for a subsequent 10 min. We found that  $\alpha$ -syn significantly reduced the NMDA-EPSC in both SPN populations. The EPSCs were reduced by  $27.2 \pm 4.2\%$  in D1R-positive SPNs [ $n = 6$ ,  $t(5) = 6.510$ ,  $P < 0.05$ ; Fig. 3E] and by  $30.1 \pm 6.3\%$  in putative D2R-positive SPNs [ $n = 4$ ,  $t(3) = 4.764$ ,  $P < 0.05$ ; Fig. 3F] and the amplitude of these reductions was similar in these two groups of SPNs ( $P > 0.05$ ). These findings suggest that  $\alpha$ -syn exerts similar effects in SPNs of the direct and indirect basal ganglia pathways equally affecting the NMDAR-mediated synaptic current.

### $\alpha$ -Synuclein affects the NMDAR current by cortico-striatal and thalamo-striatal optical stimulation

Our data suggest that  $\alpha$ -syn reduced the GluN2A-EPSC amplitude following the stimulation of glutamatergic afferents to the striatum. However, striatal SPNs receive glutamatergic inputs by both the cortex and the thalamus and these pathways might be differentially regulated by pharmacological agents (Wu *et al.*, 2015). Thus, we investigated whether  $\alpha$ -syn affected the NMDAR-mediated transmission in cortico-striatal synapses as well as in the thalamo-striatal pathway by using an optogenetic approach to better dissect inputs from these two brain structures. We first recorded NMDA-EPSCs in pharmacological isolation to evaluate the contribution of the GluN2A and GluN2B NMDAR subunits in cortico-striatal and thalamo-striatal synapses and then analysed the effect of  $\alpha$ -syn on these currents (Fig. 4A–H). SPN EPSCs, evoked by optical stimulation of cortico-striatal projections, were recorded from Thy1-ChR2-YFP mice. GluN2A- or GluN2B-EPSCs were isolated in the presence of 50  $\mu$ M picrotoxin, 10  $\mu$ M CNQX and 3  $\mu$ M ifenprodil (GluN2B antagonist) or 10  $\mu$ M TCN-201 (GluN2A antagonist), respectively.

We found that the NMDA-EPSC was significantly reduced by  $45.46 \pm 3.29\%$  in the presence of the solution

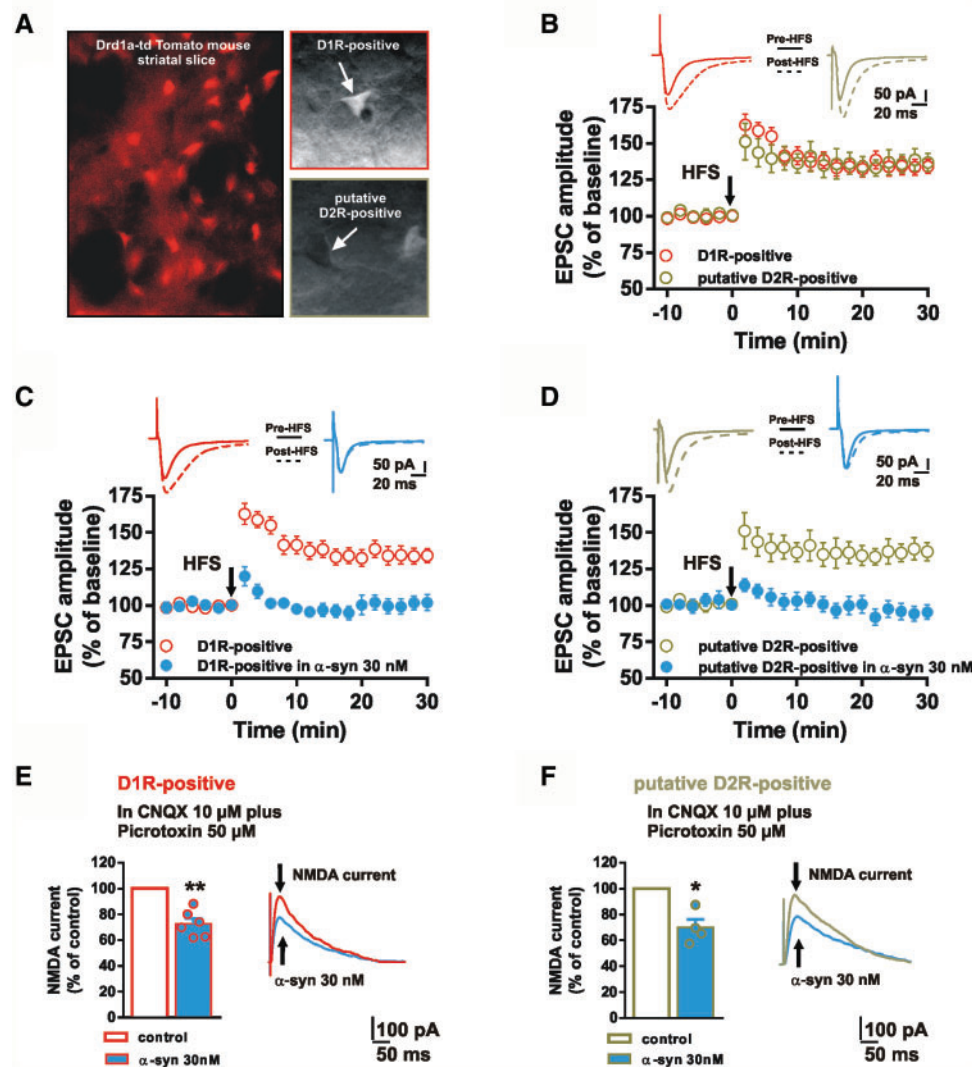

**Figure 3** Effect of  $\alpha$ -syn on SPNs of the direct and indirect basal ganglia pathway. (A) Images of three regions acquired from a striatal slice of a transgenic *Drd1a-tdTomato* mouse showing fluorescent D1R-positive neurons (left, in red and top right) and a non-fluorescent (putative D2R-positive) SPN (bottom right). (B) Example traces and time-course graph showing the LTP induced in both fluorescent ( $n = 6$ ) and non-fluorescent ( $n = 6$ ) SPNs after the delivery of the HFS protocol. (C and D) EPSC pairs (top) and time-course graphs of the EPSC amplitude (bottom) showing that  $\alpha$ -syn is able to block the LTP in both D1R-positive ( $n = 5$ ) (C) and putative D2R-positive SPNs ( $n = 5$ ) (D) following the HFS protocol. (E and F) Histograms showing the mean EPSC amplitudes of the NMDAR-mediated synaptic currents measured in pharmacological isolation in D1R-positive ( $n = 6$ ) (E) and in putative D2R-positive SPNs ( $n = 4$ ) (F) both in the control condition and after the application of 30 nM  $\alpha$ -syn. The superimposed traces show EPSCs acquired from a D1R-positive SPN (E) and putative D2R-positive SPN (F) in the presence of CNQX plus picrotoxin and in CNQX plus picrotoxin plus  $\alpha$ -syn. Note that  $\alpha$ -syn is able to reduce the NMDAR-mediated current in a similar manner in these neuronal subpopulations. Data are represented as mean  $\pm$  SEM. \* $P < 0.05$ , \*\* $P < 0.01$ .

containing ifenprodil and by  $35.04 \pm 5.47\%$  in that with TCN-201 [ifenprodil,  $n = 6$ ,  $t(5) = 13.86$ ,  $P < 0.0001$ ; TCN-201,  $n = 6$ ,  $t(5) = 6.405$ ,  $P < 0.05$ ; Fig. 4C]. We subsequently tested the effect of  $\alpha$ -syn on the isolated GluN2A- and GluN2B-EPSC.  $\alpha$ -Syn (30 nM) significantly reduced the GluN2A-EPSC by  $40.82 \pm 4.46\%$  [ $n = 6$ ,  $t(5) = 9.148$ ,  $P < 0.05$ ; Fig. 4D]. This effect was observed at 5 min, but not at 2 min, after the  $\alpha$ -syn application (at least  $n = 4$  for all the time points,  $P < 0.001$ ; Fig. 4D). Notably, longer  $\alpha$ -syn applications (10 min) did not further decrease the

NMDA current. Interestingly, we found no effect of  $\alpha$ -syn on the GluN2B-EPSC at all time points tested (at least  $n = 4$  for all time points,  $P > 0.05$ ; Fig. 4D).

Striatal SPN EPSCs were also evoked by optical stimulation of the thalamus of Thy1-ChR2-YFP mice to evaluate the contribution of the GluN2A and GluN2B currents in the NMDAR response activated by thalamic glutamatergic fibres. NMDA-EPSCs, recorded in the presence of picrotoxin plus CNQX, were significantly reduced by  $34.08 \pm 2.87\%$  in the presence of ifenprodil [ $n = 5$ ,

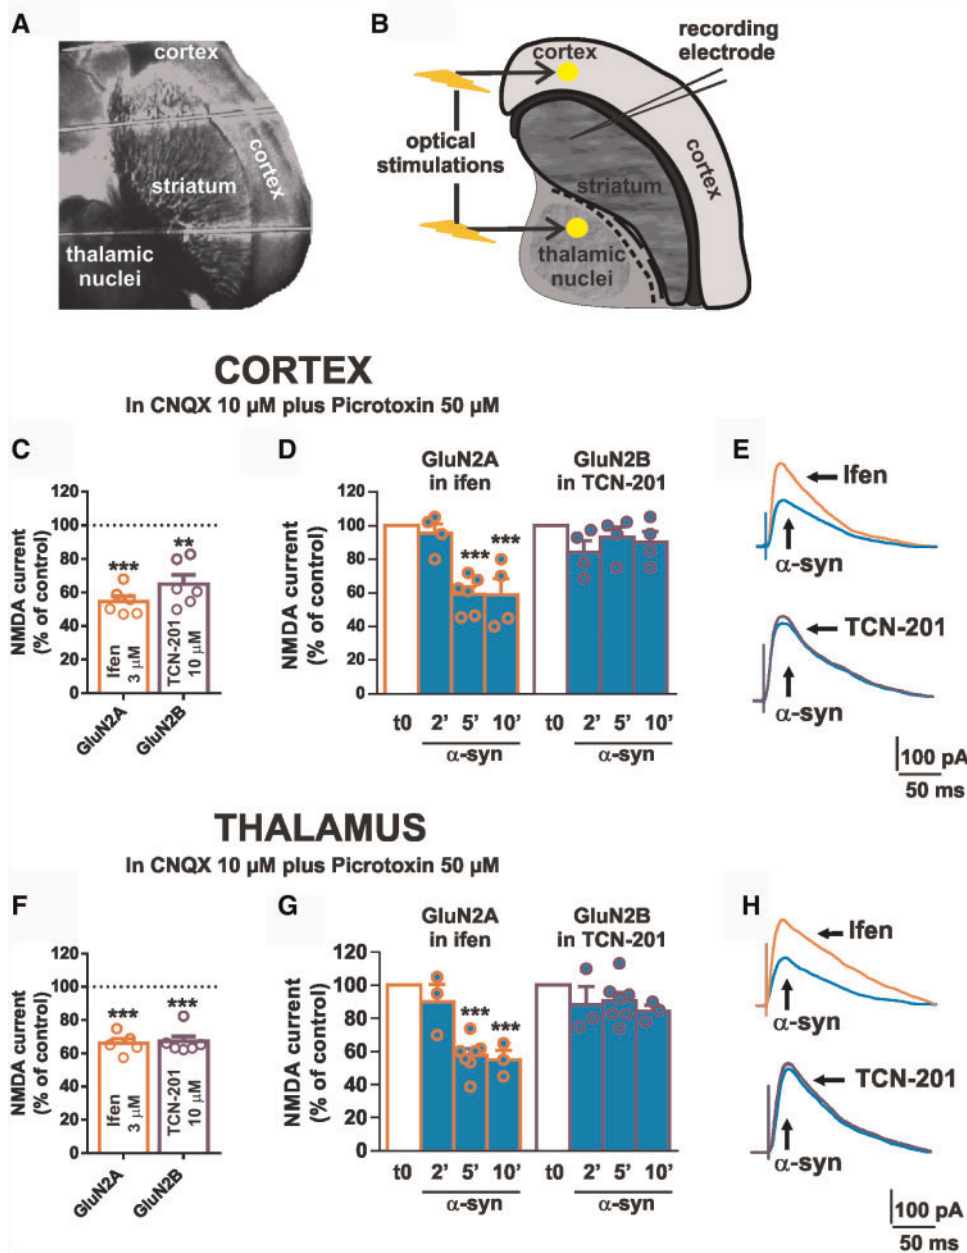

**Figure 4** Effect of  $\alpha$ -syn on SPNs activated by optical stimulation of cortico-striatal and thalamo-striatal glutamatergic afferents. (A) Representative parahorizontal brain slice including cortical, striatal and thalamic regions and (B) scheme of a parahorizontal slice showing the regions of the cortex and the thalamus where optical stimulation can activate glutamatergic afferents to SPNs recorded in the striatum. (C and F) Histograms of the SPNs mean NMDA-EPSC amplitudes optically stimulated in the cortex (C) or in the thalamus (F) in the presence of 3  $\mu$ M ifenprodil to isolate the GluN2A-EPSC ( $n = 6$  cortex,  $n = 5$  thalamus) (orange open bar) or in the presence of 10  $\mu$ M TCN-201 ( $n = 6$ ) to isolate the GluN2B-EPSC (purple open bar). Data are presented as percentage of the control NMDAR-EPSCs recorded in the presence of picrotoxin and CNQX (dotted line). (D and G) Histograms of the averaged GluN2A- and GluN2B-EPSC amplitudes optically stimulated in the cortex (D) or in the thalamus (G) measured in SPNs in the presence of picrotoxin, CNQX, ifenprodil (orange outlined bars) without ( $n = 6$ ) and with 30 nM  $\alpha$ -syn (orange outlined, cyan filled bar) and picrotoxin, CNQX, TCN-201 (purple outlined bars) without ( $n = 6$ ) and with 30 nM  $\alpha$ -syn (purple outlined, cyan filled bar).  $\alpha$ -Syn ( $n = 4-6$ ) is applied for 2, 5 and 10 min. Data are presented as percentage of the control GluN2A- and GluN2B-EPSCs. (E and H) Top: Superimposed EPSCs evoked by optical stimulation of the cortex (E) or the thalamus (H) acquired from a SPN in the presence of picrotoxin, CNQX, ifenprodil (orange trace) and after further application of 30 nM  $\alpha$ -syn (cyan trace). Bottom: EPSCs acquired from a SPN in the presence of picrotoxin, CNQX, TCN-201 (purple trace) and after further application of 30 nM  $\alpha$ -syn (cyan trace). Note that  $\alpha$ -syn significantly reduces the GluN2A- but not GluN2B-EPSC. Data are represented as mean  $\pm$  SEM.  $**P < 0.01$ ,  $***P < 0.001$ .



$t(4) = 11.87$ ,  $P < 0.05$ ; Fig. 4F] and by  $32.98 \pm 3.12\%$  in TCN-201 [ $n = 6$ ,  $t(5) = 10.57$ ,  $P < 0.05$ ; Fig. 4F].

Isolated GluN2A and GluN2B currents were subsequently measured in the presence of  $\alpha$ -syn. We found that in these conditions the GluN2A-EPSCs were reduced by  $42.35 \pm 4.0\%$  [ $n = 7$ ,  $t(6) = 10.58$ ,  $P < 0.0001$ ; Fig. 4G] while, similarly to what was observed for GluN2B-EPSCs evoked by optical cortico-striatal stimulation,  $\alpha$ -syn had no effect on the GluN2B currents ( $n = 7$ ,  $P > 0.05$ ; Fig. 4G). This effect was observed at 5 min after the  $\alpha$ -syn application. Notably, also in this case, longer  $\alpha$ -syn applications did not further decrease the NMDA current and we found no effect of  $\alpha$ -syn on the GluN2B-EPSC at all time points tested (at least  $n = 3$  for all time points,  $P > 0.05$ ; Fig. 4G).

## Monoclonal antibodies targeting $\alpha$ -synuclein rescue the impairment of LTP

$\alpha$ -Synuclein is a small protein with intrinsic tendency to aggregate. Oligomeric forms of the protein can impair neuronal function (Diogenes *et al.*, 2012; Rockenstein *et al.*, 2014). Accordingly, we found that 30 nM  $\alpha$ -syn causes LTP loss in SPNs by affecting the GluN2A NMDAR-mediated current. To counteract the effect of  $\alpha$ -syn on SPN LTP we used the monoclonal antibody Syn211, which recognizes all forms of human  $\alpha$ -syn (Giasson *et al.*, 2000) and the SynO2 antibody, which mainly recognizes early soluble oligomers and late aggregate amyloid fibrils of  $\alpha$ -syn (Majbour *et al.*, 2016).

Incubation of the slices for 1 h with the Syn211 antibody 1:10 alone did not affect LTP [ $158.3 \pm 7.4\%$ ,  $n = 7$ ,  $t(6) = 6.863$ ,  $P < 0.001$ ; Fig. 5A]. However, incubation of the slices for 1 h with the Syn211 antibody 1:10 in combination with 30 nM  $\alpha$ -syn was able to prevent the loss of LTP induced by  $\alpha$ -syn [ $153.0 \pm 54.9\%$ ,  $n = 7$ ,  $t(6) = 10.52$ ,  $P < 0.0001$ ; Fig. 5A]. Conversely, a lower antibody concentration (1:100) was not sufficient to counteract the  $\alpha$ -syn effect on LTP amplitude; in fact, SPNs recorded in the presence of Syn211 antibody 1:100 plus 30 nM  $\alpha$ -syn showed no LTP ( $n = 7$ ,  $P > 0.05$ ; Supplementary Fig. 2).

We subsequently tested the effect of the SynO2 antibody, which recognizes oligomeric forms of  $\alpha$ -syn more specifically than fibrillar forms. We found that while a very low concentration (1:10 000) of this antibody did not affect LTP *per se* [ $143.2 \pm 3.8\%$ ,  $n = 7$ ,  $t(6) = 13.33$ ,  $P < 0.0001$ ; Fig. 5B], it rescued this form of synaptic plasticity when incubated in the presence of 30 nM  $\alpha$ -syn [ $140.9 \pm 3.8\%$ ,  $n = 7$ ,  $t(6) = 12.01$ ,  $P < 0.0001$ ; Fig. 5B]. Taken together these data suggest that antibodies against  $\alpha$ -syn represent a valid tool for preventing the detrimental effect of  $\alpha$ -syn on striatal synaptic plasticity.

Next, we tested the ability of SynO2 and Syn211 antibodies to capture  $\alpha$ -syn oligomers formed during

incubation in Krebs solution. We conducted an immunoprecipitation experiment with the samples collected at T 0 and 30 min with antibodies (SynO2 or Syn211) and estimated the  $\alpha$ -syn oligomers left in the sample using our oligomeric ELISA. Interestingly, when the samples were immunoprecipitated using SynO2, the supernatant contained very low levels of  $\alpha$ -syn oligomers with both high and low concentrations (Fig. 5C), suggesting sequestration of  $\alpha$ -syn oligomer species with high efficacy (Fig. 5C,  $**P < 0.01$ ). Whereas incubation with Syn211 antibody exerted a milder effect and higher levels of  $\alpha$ -syn oligomers were detected in the supernatant (Fig. 5C,  $**P < 0.01$ ). This dose-response nicely parallels that observed in their relative efficacy in rescuing the LTP impairment induced by  $\alpha$ -syn oligomers (Fig. 5A and B).

## Incubation with $\alpha$ -synuclein specifically affects GluN2A localization at the postsynaptic membrane

Notably, incubation of the slices with Syn211 antibody 1:10 or with SynO2 antibody 1:10 000 in combination with 30 nM  $\alpha$ -syn was sufficient to prevent the reduction of GluN2A levels in the postsynaptic compartment ( $n = 6-11$ ,  $P < 0.01$ , control versus  $\alpha$ -syn;  $P < 0.05$ , Syn211 plus  $\alpha$ -syn versus  $\alpha$ -syn;  $P < 0.05$ , SynO2 plus  $\alpha$ -syn versus  $\alpha$ -syn; Fig. 5D and E). In agreement with LTP results (Supplementary Fig. 2), incubation of the slices with Syn211 antibody 1:100 did not revert the effect of 30 nM  $\alpha$ -syn on GluN2A synaptic levels ( $n = 7-11$ ,  $P < 0.01$ , control versus  $\alpha$ -syn; Supplementary Fig. 3). No effect of 30 nM  $\alpha$ -syn on synaptic localization of GluN2B subunit of NMDAR or GluA1 and GluA2 subunits of AMPAR was observed either in the absence or presence of co-incubation with Syn211 antibody 1:10 or with SynO2 antibody 1:10 000 (Supplementary Fig. 4A–D). Overall these results indicate that the observed decrease in GluN2A-NMDARs current induced by  $\alpha$ -syn is directly correlated to a reduction of the synaptic availability of this receptor subunit.

## Intrastriatal injections of $\alpha$ -synuclein protofibrils impairs visuospatial learning

To test the effects of human  $\alpha$ -syn aggregates *in vivo*, we injected PFF directly into the dorsal striatum, which is an already characterized progressive model of synucleinopathy. In fact, using a similar approach, a time-dependent spreading of  $\alpha$ -syn and neuronal degeneration has been reported about 9 months after the injection (Luk *et al.*, 2012). Figure 6A shows the TEM analysis of protofibrils and shorter aggregates (putative oligomers) injected into the rat striatum. We decided to test the effects at 6 weeks

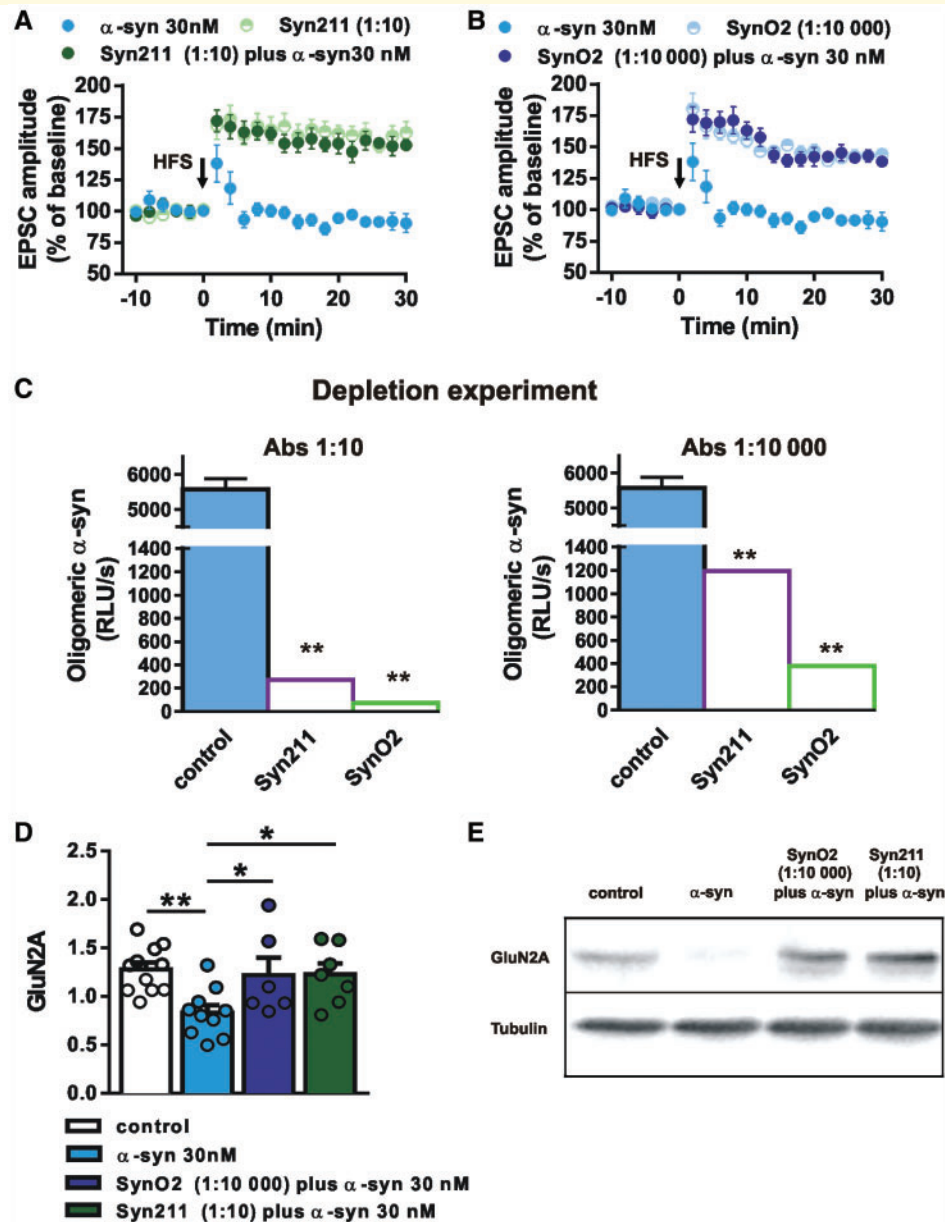

**Figure 5** Action of monoclonal antibodies against  $\alpha$ -synuclein on SPNs synaptic plasticity. **(A)** Time-course graph showing the EPSC amplitudes of SPNs recorded before and after the LTP induction by HFS in slices incubated for 1 h with 30 nM  $\alpha$ -syn and in slices treated with Syn211 antibody (1:10) alone ( $n = 7$ ) or with Syn211 antibody (1:10) plus  $\alpha$ -syn ( $n = 7$ ). **(B)** Time course of the SPNs EPSC amplitudes recorded before and after the HFS protocol in slices treated with  $\alpha$ -syn and in SPNs in the presence of SynO2 antibody alone (1:10 000) ( $n = 7$ ) or SynO2 antibody (1:10 000) plus  $\alpha$ -syn ( $n = 7$ ). Note that the treatment with Syn211 or SynO2 antibodies is able to restore the LTP in the presence of  $\alpha$ -syn. **(C)** Immunoprecipitation experiment with the samples collected at time 0 and 30 min with antibodies (SynO2 or Syn211) estimates the  $\alpha$ -syn oligomers left in the sample using oligomeric ELISA. **(D and E)** Western blot analysis for the GluN2A subunit of the NMDAR in the postsynaptic fraction (TIF) obtained from striatal slices incubated with  $\alpha$ -syn alone (30 nM) or with  $\alpha$ -syn plus Syn211 (1:10) or SynO2 (1:10 000) antibodies and control slices.  $\alpha$ -Syn reduced GluN2A localization at postsynaptic sites, while treatment with two different anti- $\alpha$ -syn antibodies was able to rescue GluN2A levels in the TIF. Data are normalized against tubulin and are shown in the graph as mean  $\pm$  SEM. \* $P < 0.05$ , \*\* $P < 0.01$ .

post-injection (Fig. 7A and B); at this time point aggregates, and other  $\alpha$ -syn forms, are evidenced through their reaction with the phospho-Ser129hu- $\alpha$ -Syn antibody (in red) and remained localized in the dorsal striatum (Fig. 6B and C).

To test whether behavioural performance was affected, PBS- and  $\alpha$ -syn-injected rats were subjected to a visuo-spatial learning task. The task was based on a habituation/dishabituation paradigm in which animals during the habituation phase (from Sessions 2 to 7), through

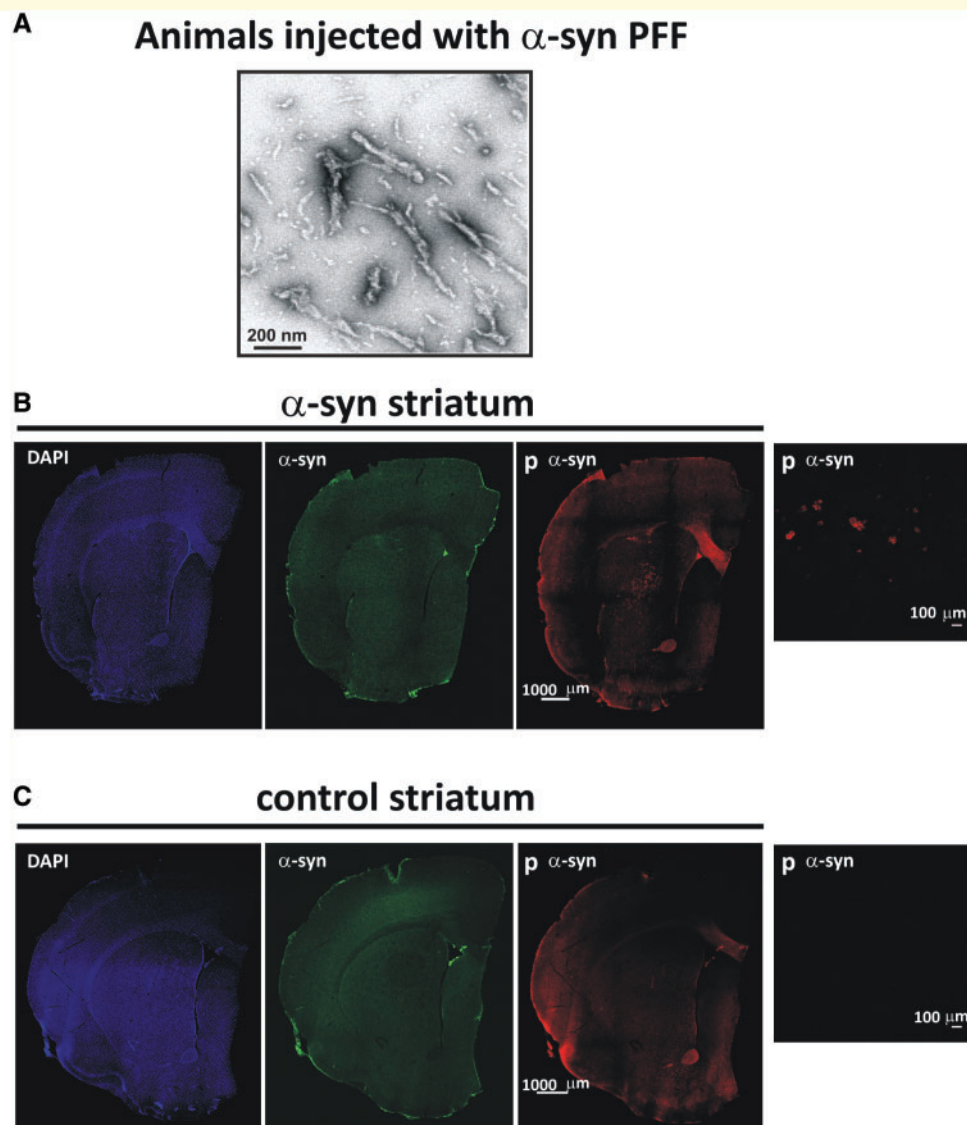

**Figure 6** Intra-striatal PFF  $\alpha$ -syn injection. **(A)** Representative TEM image of PFF preparation injected in rat striatum. **(B and C)** Representative brain slice of animals injected with  $\alpha$ -syn in the striatum. Immunofluorescence for  $\alpha$ -syn and phospho-Ser129-hu- $\alpha$ -Syn. High levels of phospho-Ser129-hu- $\alpha$ -Syn are detectable at the injection site within the striatum, with no spreading in the surrounding brain regions. **(B)** A higher magnification ( $60\times$ ) shows the  $\alpha$ -syn aggregates positive for phospho-Ser129-hu- $\alpha$ -Syn. **(C)** Representative brain slice of animals injected with PBS in the striatum. No positive staining of phospho-Ser129-hu- $\alpha$ -Syn is detectable in the striatum of the control group at low and high magnification **(C)**.

direct exploration, acquire information about three different objects and their spatial location in the arena (Fig. 7A and B). After this acquisition phase, one of the objects is displaced (Session 8); the spatial preference for the DO over the NDOs is an index of spatial novelty detection. As reported in Fig. 7B,  $\alpha$ -syn-injected rats, as well as PBS-injected animals, explore the objects during the habituation phase, reducing the exploration time across sessions: Treatment [ $F(1,15) = 0.026$ ;  $P = 0.874$ ]; Exploration [ $F(5,75) = 7.673$ ;  $P < 0.0001$ ]; Exploration  $\times$  Treatment [ $F(5,75) = 0.75$ ;  $P = 0.589$ ] (Fig. 7B). After the spatial

displacement the PBS group showed a preference for DO as compared to NDO1 and NDO2, as expected; in contrast, the  $\alpha$ -syn-injected group did not show any preference for the DO: Treatment [ $F(1,15) = 0.152$ ;  $P = 0.702$ ]; DO [ $F(2,30) = 3.387$ ;  $P = 0.047$ ]; DO  $\times$  Treatment [ $F(2,30) = 3.347$ ;  $P = 0.049$ ]. This effect was not due to a general effect on object exploration, attention or motivation to explore novelty, as both groups showed a clear preference when the same object was substituted with a new one (SO) during the last testing session: Treatment [ $F(1,15) = 0.348$ ;  $P = 0.564$ ]; SO [ $F(2,30) = 15.153$ ;  $P < 0.0001$ ]; SO  $\times$  Treatment [ $F(2,30) = 0.87$ ;  $P = 0.429$ ].



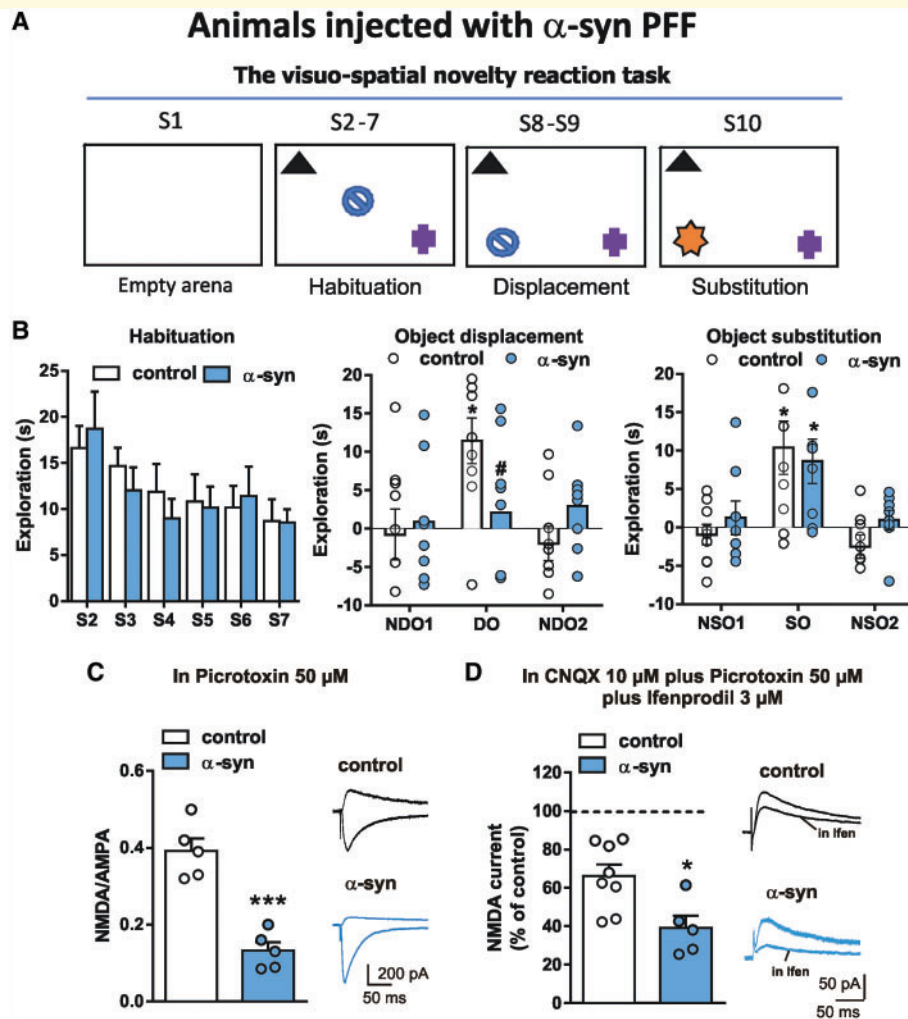

**Figure 7 Behavioural and electrophysiological alterations in rats injected with human  $\alpha$ -syn.** (A) Schematic representation of the visuospatial novelty reaction task. Rats were habituated to the empty arena (Session I, S1). During the habituation phase they were allowed to explore for six consecutive sessions (S2–S7) three different objects kept in constant position. Spatial learning was tested by displacing the position of one object, the blue one (displaced object, DO), and comparing its relative preference as compared to the non-displaced objects (NDOs), the black and the purple objects (S8). Animals were given a further session to habituate to the spatial change (S9). During the last session object learning was tested by substituting one of the three objects (the blue object; substituted object, SO) with a new object (orange), and the other two objects with identical copies, to avoid the use of olfactory cues for object recognition (non-substituted objects, NSOs) (S10). (B) Histograms showing the mean time(s) of objects exploration during the habituation phase by control and  $\alpha$ -syn rats (left); Re-exploration index of displaced and non-displaced objects after the spatial change, showing that control, but not  $\alpha$ -syn rats, prefer DO versus NDO (middle). Re-exploration index of substituted SO and NSOs after the object change, showing that both control and  $\alpha$ -syn rats preferred the SO versus NSOs (right). \* $P < 0.05$  DO/SO versus NDO/NSO, within group; # $P < 0.05$   $\alpha$ -syn versus control, Duncan *post hoc* test. Control rats,  $n = 9$ ,  $\alpha$ -syn rats,  $n = 8$ . (C) Histogram showing the NMDA/AMPA ratio measured in SPNs of  $\alpha$ -syn- ( $n = 5$ ) and sham-injected (control) rats ( $n = 5$ ). Traces showing an EPSC measured at +40 mV and –80 mV holding potential in a SPN of a control and  $\alpha$ -syn rat. (D) Histogram showing the NMDA-current amplitude of SPNs from  $\alpha$ -syn ( $n = 5$ ) and control rats ( $n = 5$ ) before (dashed line) and after the application of ifenprodil to isolate the GluN2A-mediated NMDA-current. Traces showing an EPSC measured at +40 mV holding potential in a SPN of a control and  $\alpha$ -syn rat before and after the application of ifenprodil. \* $P < 0.05$ , \*\* $P < 0.01$ .

## Intrastriatal injections of $\alpha$ -synuclein aggregates impair the spiny projection neurons GluN2A-bearing NMDAR-current

We subsequently attempted to test the possible causal link between the presence of striatal  $\alpha$ -syn aggregates, the

synaptic transmission deficits, as observed in the *in vitro* electrophysiological experiments using  $\alpha$ -syn oligomers, and the behavioural deficits of  $\alpha$ -syn-injected rats in performing the visuospatial learning task.

A group of human  $\alpha$ -syn- and sham-injected rats were sacrificed 1 week after the behavioural task. SPNs of the two groups were patch-clamped and EPSCs were evoked at –80 mV holding potential, in the presence of 50  $\mu$ M

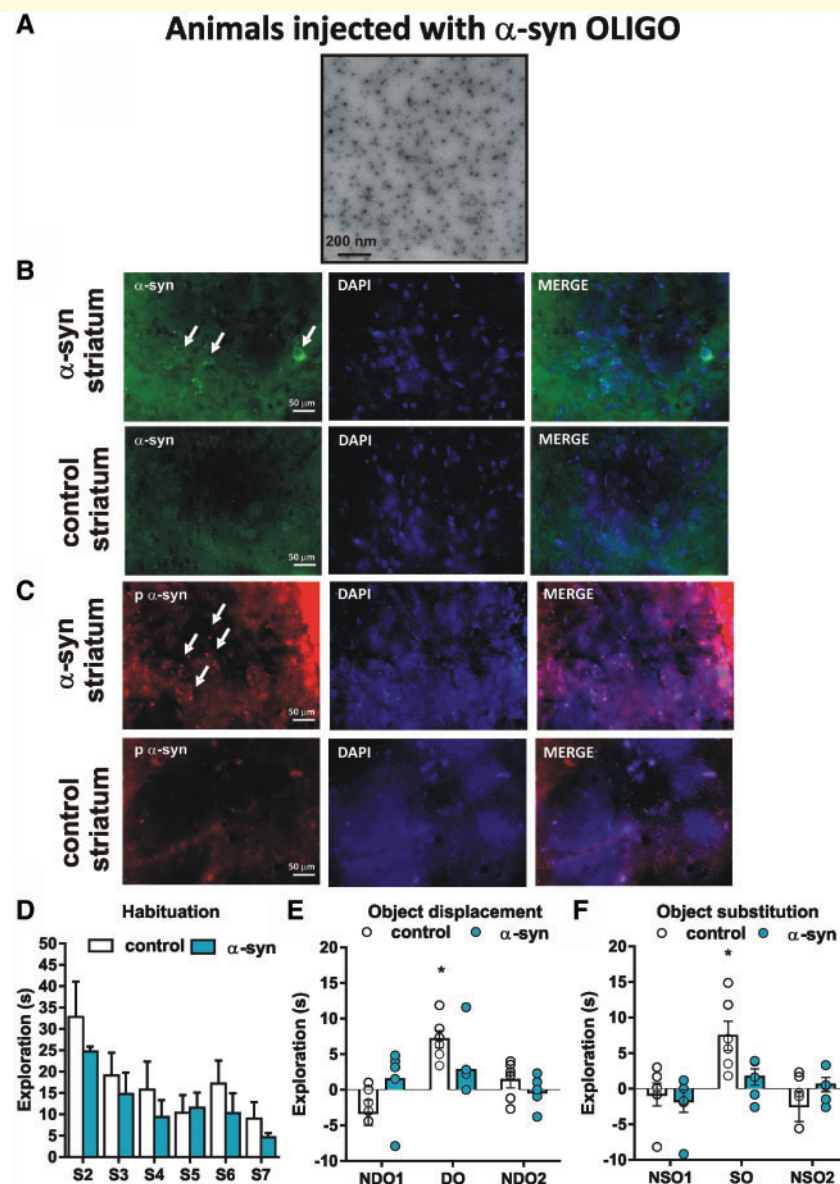

**Figure 8** Intra-striatal oligomeric  $\alpha$ -syn injection and behavioural alterations. (A) Representative TEM image of OLIGO  $\alpha$ -syn preparation injected in rat striatum showing a majority of small oligomers with very few protofibrils. (B and C) Representative images of animals injected with  $\alpha$ -syn in the striatum. Immunofluorescence for hu- $\alpha$ -syn (B) and phospho-Ser129-hu- $\alpha$ -Syn (C). Magnified ( $\times 40$ ) images show that high levels of hu- $\alpha$ -syn (B) and phospho-Ser129-hu- $\alpha$ -Syn (C) are detectable within the striatum. Representative images of animals injected with PBS in the striatum (B and C). No positive staining of phospho-Ser129-hu- $\alpha$ -Syn (C) is detectable in the striatum of the control group at  $\times 40$  magnification. Arrows indicate hu- $\alpha$ -syn and phospho-Ser129-hu- $\alpha$ -Syn positive cells. Scale bars = 50  $\mu$ m. (D–F) Histograms showing the mean time(s) of objects exploration during the habituation phase by control and oligomeric  $\alpha$ -syn rats. Re-exploration index of DO and NDOs after the spatial change, showing that control, but not  $\alpha$ -syn rats, prefer DO versus NDOs (middle). Re-exploration index of SO and NSOs after the object change, showing that both control and  $\alpha$ -syn rats preferred SO versus NSOs (right). Control rats,  $n = 6$ , oligomeric  $\alpha$ -syn rats,  $n = 6$ . \* $P < 0.05$  DO/SO versus NDO/NSO, within group, Duncan *post hoc* test.

microtoxin, and at +40 mV, in microtoxin plus 10  $\mu$ M CNQX, to calculate the NMDA/AMPA ratio of the synaptic current. Statistical analysis revealed that SPNs of  $\alpha$ -syn-injected rats presented reduced NMDA/AMPA ratio in respect to sham-injected animals [ $\alpha$ -syn versus sham,  $n = 5$  for each group,  $t$ -test,  $t(8) = 6.6$ ,  $P < 0.001$ ; Fig. 7C]. In addition, since  $\alpha$ -syn oligomers specifically reduced the

GluN2A-bearing NMDAR-currents (Fig. 2C), EPSCs of SPNs from  $\alpha$ -syn- and sham-injected rats were also recorded at +40 mV holding current in the presence of CNQX plus 3  $\mu$ M ifenprodil to measure the GluN2A-EPSC amplitude. We found that in SPNs of  $\alpha$ -syn-injected rats the GluN2A-current was significantly smaller than that of sham rats [ $\alpha$ -syn versus sham in ifenprodil,  $t$ -test,

$t(11) = 2.2$ ,  $P < 0.05$ ; Fig. 7D] confirming that the spreading of  $\alpha$ -syn aggregates into the striatum affects the striatal synaptic transmission by reducing the SPN GluN2A-NMDA current with significant implications on behavioural learning.

## Behavioural effects produced by intrastriatal injection of oligomeric $\alpha$ -synuclein

Intrastriatal injections of human  $\alpha$ -syn aggregates, containing protofibrils but also shorter forms (Fig. 6A), clearly produced behavioural and synaptic alterations (Fig. 7). These alterations could be due either to the action of oligomeric and monomeric  $\alpha$ -syn forms, similar to those applied in our *in vitro* experiments, or to the critical presence of fibrillary PFF forms of this protein. Thus, to better dissect the pathogenetic role of different species of  $\alpha$ -syn (protofibrils versus oligomers and monomers), we performed a similar *in vivo* intrastriatal injection with  $\alpha$ -syn cocktail mainly containing oligomers (OLIGO).

We injected the  $\alpha$ -syn cocktail ( $\alpha$ -syn OLIGO) directly into the dorsal striatum (Fig. 8A and B), using the same protocol as used for PFF. As previously indicated for PFF (Fig. 6A), the presence of  $\alpha$ -syn OLIGO was also detected by TEM (Fig. 8A). Electron microscopy was used to analyse the quality of  $\alpha$ -syn preparations before injection into the rat striatum confirming the presence of oligomers with very few protofibrils (Fig. 8A). In addition,  $\alpha$ -syn OLIGO has been confirmed by immunofluorescence with antibodies against  $\alpha$ -syn and phospho- $\alpha$ -syn (Fig. 8B and C).

As reported in Fig. 8D–F,  $\alpha$ -syn OLIGO-injected rats, as well as PBS-injected animals, explore the objects during the habituation phase, reducing the exploration time across sessions: Treatment [ $F(1,10) = 0.86$ ;  $P = 0.375$ ]; Exploration [ $F(5,50) = 9.65$ ;  $P < 0.0001$ ]; Exploration  $\times$  Treatment [ $F(5,50) = 0.45$ ;  $P = 0.80$ ] (Fig. 8D). The  $\alpha$ -syn OLIGO-injected group did not show any preference for the displaced object: Treatment [ $F(1,10) = 0.138$ ;  $P = 0.702$ ]; DO [ $F(2,20) = 8.039$ ;  $P = 0.0027$ ]; DO  $\times$  Treatment [ $F(2,20) = 4.7$ ;  $P = 0.02$ ] and substituted object: Treatment [ $F(1,10) = 0.713$ ;  $P = 0.41$ ]; SO [ $F(2,20) = 8.70$ ;  $P = 0.0019$ ]; SO  $\times$  Treatment [ $F(2,20) = 3.99$ ;  $P = 0.03$ ] (Fig. 8E and F), thus suggesting that it impaired both spatial and object novelty recognition, in the absence of major degeneration of TH-positive terminals in the striatum (Supplementary Fig. 5).

Analysis of basal motor activity in the open field reveals that at this early stage neither animals injected with protofibrils nor animals injected with  $\alpha$ -syn OLIGO show significant changes of motor behaviour (Supplementary Fig. 6).

## Discussion

In this study we have investigated the effects of exogenous human  $\alpha$ -syn on synaptic transmission and plasticity of

SPNs, the main neuronal subtype of the striatum. We obtained four novel findings: (i)  $\alpha$ -syn impairs LTP by altering the activity of the GluN2A-containing NMDARs in SPNs belonging to the direct and indirect basal ganglia pathways; (ii)  $\alpha$ -syn produces a reduction of NMDAR-mediated currents in SPNs optically activated by stimulation of either cortical or thalamic afferents; (iii) the application of  $\alpha$ -syn-neutralizing antibodies prevents the widespread impairment of striatal LTP; (iv) intrastriatal injection of  $\alpha$ -syn PFF produces deficits in visuospatial learning and GluN2A NMDA receptor function; and (v) the intrastriatal injection of oligomers ( $\alpha$ -syn OLIGO) mimics the behavioural effects produced by PFF, causing an even more severe visuospatial alteration. These data suggest that oligomeric/monomeric forms play a more relevant role than fibrillary forms on striatal-dependent behaviour.

## Striatal dysfunction as an early effect of $\alpha$ -synuclein toxicity

The complex alterations of the basal ganglia pathways in Parkinson's disease involve degeneration of nigral dopamine neurons that leads to reduced striatal dopamine content and impaired synaptic plasticity of SPNs (Calabresi *et al.*, 2007; Gerfen and Surmeier, 2011). These changes are accompanied by accumulation of  $\alpha$ -syn (Spillantini and Goedert, 2016), exerting a toxic role in Parkinson's disease in its oligomeric forms (Conway *et al.*, 1998; Winner *et al.*, 2011; Rockenstein *et al.*, 2014) rather than in the fibrillar state or when clustered into Lewy bodies (Ghosh *et al.*, 2015).

Although it has been reported previously that in the hippocampus micromolar concentrations of extracellular  $\alpha$ -syn oligomers are able to impair LTP and to increase basal synaptic transmission through an NMDAR-mediated action (Diogenes *et al.*, 2012), little is known about the direct effects of  $\alpha$ -syn oligomers on striatal neurotransmission, a fundamental player in the regulation of voluntary motor function in physiological conditions and in Parkinson's disease. Our findings, demonstrating widespread involvement of much lower (nanomolar) concentrations of  $\alpha$ -syn oligomers in the alteration of synaptic transmission in striatal SPNs, are particularly relevant given the role exerted by altered forms of this protein in Parkinson's disease (Polymeropoulos *et al.*, 1997; Spillantini *et al.*, 1997; Vekrellis *et al.*, 2011). These results extend our previous findings demonstrating that  $\alpha$ -syn oligomers are able to block LTP of striatal cholinergic interneurons at lower concentrations (3 nM) with respect to that effective on SPNs in the present study (30 nM), by selectively modulating the GluN2D-expressing NMDA receptors (Tozzi *et al.*, 2016). Taken together, these findings suggest that increasing concentrations of  $\alpha$ -syn oligomers progressively affect NMDAR-mediated synaptic plasticity on distinct neuronal populations indicating that the vulnerability to this protein is cell- and region-specific.



## Distinct vulnerability of different NMDA receptor subunits to $\alpha$ -synuclein

We found that  $\alpha$ -syn impairs NMDAR-dependent LTP in striatal SPNs with no detrimental effect on LTD, according to the observation that this latter form of synaptic plasticity in the striatum does not require NMDAR activation (Calabresi *et al.*, 2007).

We observed that  $\alpha$ -syn affected SPN glutamatergic transmission by selectively affecting GluN2A-expressing NMDAR currents. This is a remarkable finding since NMDAR bearing the GluN2A receptor subunit is necessary for LTP induction (Paoletti *et al.*, 2013). Accordingly, we have shown here that activity-dependent LTP in SPNs is blocked by antagonists acting on the GluN2A, but not GluN2B, NMDAR subunit. In line with these findings, our data rule out significant effects of  $\alpha$ -syn on currents mediated by the GluN2B subunit of NMDAR and by AMPAR. Moreover, as evidenced by western blot assay,  $\alpha$ -syn is able to lower the synaptic localization of the GluN2A NMDAR subunit in striatal slices without affecting levels of other subunits of ionotropic glutamate receptors.

## $\alpha$ -Synuclein alters NMDAR-mediated excitatory transmission at spiny projection neurons of both direct and indirect pathways

According to the classical view, striato-nigral SPNs express D1-like dopamine receptors, representing the direct pathway of the basal ganglia, while striato-pallidal SPNs express the D2-like dopamine receptors, representing neurons of the indirect pathway (Gerfen *et al.*, 1990; Gerfen and Surmeier, 2011). This differential molecular expression of dopamine receptors is important for two functional reasons. Firstly, activation of D1 dopamine receptor signalling is required for LTP (Reynolds *et al.*, 2001; Calabresi *et al.*, 2007), while D2 dopamine receptors are mainly implicated in LTD (Kreitzer and Malenka, 2007; Shen *et al.*, 2008). The second aspect regards their possible different role in the motor function. In fact, activation of the direct pathway by dopamine is thought to promote movement initiation, whereas the activation of the indirect pathway would be involved in inhibition of motor activity (Mink, 2003; Nambu, 2008; Gerfen and Surmeier, 2011). In apparent contrast with this dichotomous view, more recent studies propose a new vision of the basal ganglia functionality, based on signalling integration at different levels (Cui *et al.*, 2013; Calabresi *et al.*, 2014). Anatomical evidence reported the existence of ‘bridging collaterals’, axon collaterals connecting neurons of the direct and indirect pathways (Cazorla *et al.*, 2015). Based on these different theories, using striatal slices from

dtTomato mice, we investigated whether the alteration of LTP caused by  $\alpha$ -syn occurs either in a single or in both subpopulations of SPNs. We found that the detrimental effect of  $\alpha$ -syn on LTP and on NMDAR synaptic currents is evident both in D1- and D2-expressing SPNs.

## Cortico-striatal and thalamo-striatal glutamatergic inputs are equally affected by $\alpha$ -synuclein

Further evidence of the widespread toxic effect of  $\alpha$ -syn on striatal synapses come from our investigation of the NMDAR-mediated current in cortico-striatal and in thalamo-striatal pathways. The striatum receives glutamatergic inputs both from cerebral cortex and thalamus (McGeorge and Faull, 1989; Smith *et al.*, 2004; Doig *et al.*, 2010) and these two systems act in concert to regulate motor function differentially contributing to specific tasks. Cortical afferents projecting to the dorsal striatum are mainly involved in planning, learning and execution of motor behaviour (Jog *et al.*, 1999), whereas the thalamo-striatal inputs modulate attention-related stimuli, being engaged in behavioural switching, reinforcement functions and attention set-shifting (Smith *et al.*, 2011). Moreover, these two systems might differentially contribute, in patients with Parkinson’s disease, to the generation of glutamatergic dysfunction in the striatum. Thus, we have investigated a possible differential effect of  $\alpha$ -syn on cortico-striatal versus thalamo-striatal synapses. To this aim we used a distinct optical stimulation of the two pathways using parahorizontal brain slices. Compared to coronal slices, this particular tissue preparation allows us to specifically discriminate the two projections converging on SPNs (Smeal *et al.*, 2007). Interestingly,  $\alpha$ -syn caused a similar reduction of GluN2A NMDAR current evoked by selectively activating either cortical or thalamic fibres. This finding, together with previous experiments performed with electrical stimulation, supports the idea that  $\alpha$ -syn causes a widespread alteration of excitatory synaptic transmission within the striatum.

## The widespread striatal synaptic dysfunction can be prevented by antibodies against $\alpha$ -synuclein

Several studies described the consequences of the application of antibodies against  $\alpha$ -syn, reporting improvement in intracellular  $\alpha$ -syn aggregates clearing, reduction of  $\alpha$ -syn fibril propagation, together with attenuation of memory and neurodegenerative deficits (Spencer *et al.*, 2017). In the attempt to clarify whether specific monoclonal antibodies against  $\alpha$ -syn exert protective effects over synaptic plasticity, we used Syn211 and SynO2 antibodies; both antibodies recognize all forms of human  $\alpha$ -syn, however, the SynO2 antibody is much more potent than the Syn211 antibody in binding  $\alpha$ -syn oligomers and fibrils (Giasson *et al.*, 2000; Majbour *et al.*, 2016). The depletion

experiment that we performed confirmed that both Syn211 and SynO2 show affinity for  $\alpha$ -syn oligomeric aggregates, with a different binding specificity between the two antibodies. Interestingly, we found that an overlapping dose-response effect of the two antibodies in rescuing the LTP impairment induced by  $\alpha$ -syn in striatal SPNs. The two antibodies also prevented the reduction of GluN2A expression levels caused by  $\alpha$ -syn. This protective effect is consistent with our observation that  $\alpha$ -syn alters LTP affecting NMDAR-mediated currents, in particular the GluN2A subunit. Interestingly, the PFF preparation injected intrastrially in *in vivo* experiments contained both OLIGO and PFF aggregates.

## Differential effect of fibrillar versus oligomeric forms of $\alpha$ -synuclein on visuospatial learning

Accumulating *in vivo* evidence showed that  $\alpha$ -syn protofibrils directly injected into the striatum lead to a time-dependent spreading accompanied by neuronal loss and motor deficits in mice within 9 months after the injection (Luk *et al.*, 2012). In this study we aimed to verify whether the pathological interaction between  $\alpha$ -syn aggregates and NMDA receptors in the striatum led to impaired behavioural function; for this reason, we focused on an early time point when the aggregates remained localized within the striatum. To dissect the behavioural effects of  $\alpha$ -syn aggregates we used a visuospatial learning task that we have previously shown to rely on NMDAR activation in the dorsal striatum (De Leonibus *et al.*, 2003, 2005).  $\alpha$ -Syn PFF injected rats show impaired spatial novelty detection, although they normally explore the objects during the habituation phase and can discriminate a new object among familiar ones.

Interestingly, the intrastriatal injection of oligomers mimics the behavioural effects produced by PFF. This effect is even more severe than that induced by PFF injection since while fibrils only affect the ability to discriminate the object displacement, oligomers impair both spatial and object novelty recognition. This is surprising considering that the PFF preparation injected intrastrially in *in vivo* experiments contained both OLIGO and PFF aggregates and that the  $\alpha$ -syn cocktail producing the rapid synaptic and plastic alterations mainly contains oligomeric/monomeric forms, but little or no fibrils, as confirmed by the ThT analyses.

While the effect of *in vivo* injection of  $\alpha$ -syn on SPN NMDAR currents does not provide a direct mechanistic explanation that NMDAR changes are responsible for the described behavioural alteration, it confirms that  $\alpha$ -syn is able to produce molecular changes affecting the function of this receptor with possible behavioural consequences.

Our experiments in  $\alpha$ -syn-injected rats showed specific deficits in visuospatial exploration while locomotor activity was not affected respect to control animals. It is possible

that we failed to detect motor deficits because of the site and/or size of the injection within the striatum.

Taken together, these findings suggest that oligomeric  $\alpha$ -syn itself is harmful for synaptic plasticity and behavioural functions of the dorsal striatum. We speculate that further  $\alpha$ -syn aggregation into protofibrils might limit their direct impact within the area of injection, while favouring their spreading across brain regions as previously reported (Luk *et al.*, 2012). Further studies are necessary to address this issue. The translational relevance of these preclinical data for Parkinson's disease are evidenced by findings in humans showing visuospatial learning deficit in *de novo* Parkinson's disease patients showing spatial location deficits (Pillon *et al.*, 1997).

## Conclusions

Although the role of  $\alpha$ -syn in the pathogenesis of Parkinson's disease has been thoroughly investigated, little is known about the effect of  $\alpha$ -syn on striatal synaptic transmission and related early behavioural alterations. Our research demonstrates a widespread and NMDAR-related dysfunction of striatal synaptic network induced by  $\alpha$ -syn. We report for the first time that  $\alpha$ -syn, through interaction with GluN2A-bearing NMDAR, impairs LTP in SPNs of the direct and indirect basal ganglia pathways and causes visuospatial learning deficit. The  $\alpha$ -syn-induced synaptopathy is also observed when neurons are optogenetically activated by either cortical or thalamic inputs. Notably, both plastic and behavioural alterations observed in our study do not seem to be dependent on dopaminergic degeneration. In fact, the plastic dysfunctions induced by acute *in vitro* application of  $\alpha$ -syn are not rescued by exogenous dopamine. Accordingly, the observed visuospatial learning deficits are not associated with a loss of dopaminergic terminals. Moreover, the open field analysis does not show overt motor impairment indicating that our *in vivo* model recapitulates an early stage of the disease.

Finally, we provide evidence that antibodies neutralizing  $\alpha$ -syn are effective in blocking its detrimental actions. Taken together these data support the use of antibodies against  $\alpha$ -syn as a valid approach to preserve the functionality of synaptic plasticity in the striatal network.

## Acknowledgements

We thank Cristiano Spaccatini, Nadia Santo and Elisa Zianni for their excellent technical support.

## Funding

This work was supported by grants from Fondazione Cariplo Grant 2014–0660 (F.G. and P.C.), MIUR-PRIN 2015FNWP34 (P.C., F.G. and E.D.L.), Ricerca Finalizzata RF-2013–02356215 (P.C. and F.G.) and RF-2013–02357386

(A.T.). V.D. at present has a fellowship from “Dipartimento Neuroscienze, psicologia, area del farmaco e salute del bambino, Università di Firenze”, her position has been supported by “AIRAzh Onlus-COOP Italia”. This work/project was supported by a grant (V.G., P.C.) from the Fresco Parkinson Institute to New York University School of Medicine and The Marlene and Paolo Fresco Institute for Parkinson's and Movement Disorders, which was made possible with support from Marlene and Paolo Fresco.

## Competing interests

All authors reported no biomedical financial interests or potential conflicts of interest.

## Supplementary material

Supplementary material is available at *Brain* online.

## References

- Abeliovich A, Schmitz Y, Farinas I, Choi-Lundberg D, Ho WH, Castillo PE, et al. Mice lacking alpha-synuclein display functional deficits in the nigrostriatal dopamine system. *Neuron* 2000; 25: 239–52.
- Arenkiel BR, Peca J, Davison IG, Feliciano C, Deisseroth K, Augustine GJ, et al. In vivo light-induced activation of neural circuitry in transgenic mice expressing channelrhodopsin-2. *Neuron* 2007; 54: 205–18.
- Cabin DE, Shimazu K, Murphy D, Cole NB, Gottschalk W, McIlwain KL, et al. Synaptic vesicle depletion correlates with attenuated synaptic responses to prolonged repetitive stimulation in mice lacking alpha-synuclein. *J Neurosci* 2002; 22: 8797–807.
- Calabresi P, Maj R, Pisani A, Mercuri NB, Bernardi G. Long-term synaptic depression in the striatum: physiological and pharmacological characterization. *J Neurosci* 1992a; 12: 4224–33.
- Calabresi P, Picconi B, Tozzi A, Di Filippo M. Dopamine-mediated regulation of corticostriatal synaptic plasticity. *Trends Neurosci* 2007; 30: 211–9.
- Calabresi P, Picconi B, Tozzi A, Ghiglieri V, Di Filippo M. Direct and indirect pathways of basal ganglia: a critical reappraisal. *Nat Neurosci* 2014; 17: 1022–30.
- Calabresi P, Pisani A, Mercuri NB, Bernardi G. Long-term potentiation in the striatum is unmasked by removing the voltage-dependent magnesium block of NMDA receptor channels. *Eur J Neurosci* 1992b; 4: 929–35.
- Cazorla M, Kang UJ, Kellendonk C. Balancing the basal ganglia circuitry: a possible new role for dopamine D2 receptors in health and disease. *Mov Disord* 2015; 30: 895–903.
- Conway KA, Harper JD, Lansbury PT. Accelerated in vitro fibril formation by a mutant alpha-synuclein linked to early-onset Parkinson disease. *Nat Med* 1998; 4: 1318–20.
- Cui G, Jun SB, Jin X, Pham MD, Vogel SS, Lovinger DM, et al. Concurrent activation of striatal direct and indirect pathways during action initiation. *Nature* 2013; 494: 238–42.
- De Leonibus E, Lafenetre P, Oliverio A, Mele A. Pharmacological evidence of the role of dorsal striatum in spatial memory consolidation in mice. *Behav Neurosci* 2003; 117: 685–94.
- De Leonibus E, Manago F, Giordani F, Petrosino F, Lopez S, Oliverio A, et al. Metabotropic glutamate receptors 5 blockade reverses spatial memory deficits in a mouse model of Parkinson's disease. *Neuropsychopharmacology* 2009; 34: 729–38.
- De Leonibus E, Oliverio A, Mele A. A study on the role of the dorsal striatum and the nucleus accumbens in allocentric and egocentric spatial memory consolidation. *Learn Mem* 2005; 12: 491–503.
- De Leonibus E, Pascucci T, Lopez S, Oliverio A, Amalric M, Mele A. Spatial deficits in a mouse model of Parkinson disease. *Psychopharmacology (Berl)* 2007; 194: 517–25.
- Ding J, Peterson JD, Surmeier DJ. Corticostriatal and thalamostriatal synapses have distinctive properties. *J Neurosci* 2008; 28: 6483–92.
- Diogenes MJ, Dias RB, Rombo DM, Vicente Miranda H, Maiolino F, Guerreiro P, et al. Extracellular alpha-synuclein oligomers modulate synaptic transmission and impair LTP via NMDA-receptor activation. *J Neurosci* 2012; 32: 11750–62.
- Doig NM, Moss J, Bolam JP. Cortical and thalamic innervation of direct and indirect pathway medium-sized spiny neurons in mouse striatum. *J Neurosci* 2010; 30: 14610–8.
- Dunah AW, Wang Y, Yasuda RP, Kameyama K, Haganir RL, Wolfe BB, et al. Alterations in subunit expression, composition, and phosphorylation of striatal N-methyl-D-aspartate glutamate receptors in a rat 6-hydroxydopamine model of Parkinson's disease. *Mol Pharmacol* 2000; 57: 342–52.
- El-Agnaf OM, Salem SA, Paleologou KE, Cooper LJ, Fullwood NJ, Gibson MJ, et al. Alpha-synuclein implicated in Parkinson's disease is present in extracellular biological fluids, including human plasma. *FASEB J* 2003; 17: 1945–7.
- Gallegos S, Pacheco C, Peters C, Opazo CM, Aguayo LG. Features of alpha-synuclein that could explain the progression and irreversibility of Parkinson's disease. *Front Neurosci* 2015; 9: 59.
- Gardoni F, Picconi B, Ghiglieri V, Polli F, Bagetta V, Bernardi G, et al. A critical interaction between NR2B and MAGUK in L-DOPA induced dyskinesia. *J Neurosci* 2006; 26: 2914–22.
- Gerfen CR, Engber TM, Mahan LC, Susel Z, Chase TN, Monsma FJ Jr, et al. D1 and D2 dopamine receptor-regulated gene expression of striatonigral and striatopallidal neurons. *Science* 1990; 250: 1429–32.
- Gerfen CR, Surmeier DJ. Modulation of striatal projection systems by dopamine. *Annu Rev Neurosci* 2011; 34: 441–66.
- Ghiglieri V, Calabrese V, Calabresi P. Alpha-synuclein: from early synaptic dysfunction to neurodegeneration. *Front Neurol* 2018; 9: 295.
- Ghosh D, Singh PK, Sahay S, Jha NN, Jacob RS, Sen S, et al. Structure based aggregation studies reveal the presence of helix-rich intermediate during alpha-Synuclein aggregation. *Sci Rep* 2015; 5: 9228.
- Giasson BI, Jakes R, Goedert M, Duda JE, Leight S, Trojanowski JQ, et al. A panel of epitope-specific antibodies detects protein domains distributed throughout human alpha-synuclein in Lewy bodies of Parkinson's disease. *J Neurosci Res* 2000; 59: 528–33.
- Jocoy EL, Andre VM, Cummings DM, Rao SP, Wu N, Ramsey AJ, et al. Dissecting the contribution of individual receptor subunits to the enhancement of N-methyl-d-aspartate currents by dopamine D1 receptor activation in striatum. *Front Syst Neurosci* 2011; 5: 28.
- Jog MS, Kubota Y, Connolly CI, Hillegaart V, Graybiel AM. Building neural representations of habits. *Science* 1999; 286: 1745–9.
- Kirik D, Rosenblad C, Bjorklund A. Characterization of behavioral and neurodegenerative changes following partial lesions of the nigrostriatal dopamine system induced by intrastriatal 6-hydroxydopamine in the rat. *Exp Neurol* 1998; 152: 259–77.
- Kreitzer AC, Malenka RC. Endocannabinoid-mediated rescue of striatal LTD and motor deficits in Parkinson's disease models. *Nature* 2007; 445: 643–7.
- Lim DH, Mohajerani MH, Ledue J, Boyd J, Chen S, Murphy TH. In vivo large-scale cortical mapping using channelrhodopsin-2 stimulation in transgenic mice reveals asymmetric and reciprocal relationships between cortical areas. *Front Neural Circuits* 2012; 6: 11.
- Luk KC, Kehm V, Carroll J, Zhang B, O'Brien P, Trojanowski JQ, et al. Pathological alpha-synuclein transmission initiates Parkinson-like neurodegeneration in nontransgenic mice. *Science* 2012; 338: 949–53.



- Majbour NK, Vaikath NN, van Dijk KD, Ardah MT, Varghese S, Vesterager LB, et al. Oligomeric and phosphorylated alpha-synuclein as potential CSF biomarkers for Parkinson's disease. *Mol Neurodegener* 2016; 11: 7.
- McGeorge AJ, Faull RL. The organization of the projection from the cerebral cortex to the striatum in the rat. *Neuroscience* 1989; 29: 503–37.
- Mellone M, Stanic J, Hernandez LF, Iglesias E, Zianni E, Longhi A, et al. NMDA receptor GluN2A/GluN2B subunit ratio as synaptic trait of levodopa-induced dyskinesias: from experimental models to patients. *Front Cell Neurosci* 2015; 9: 245.
- Mink JW. The Basal Ganglia and involuntary movements: impaired inhibition of competing motor patterns. *Arch Neurol* 2003; 60: 1365–8.
- Nambu A. Seven problems on the basal ganglia. *Curr Opin Neurobiol* 2008; 18: 595–604.
- Nilsson MR. Techniques to study amyloid fibril formation in vitro. *Methods* 2004; 34: 151–60.
- Paoletti P, Bellone C, Zhou Q. NMDA receptor subunit diversity: impact on receptor properties, synaptic plasticity and disease. *Nat Rev Neurosci* 2013; 14: 383–400.
- Paxinos GW, Watson C. The rat brain stereotaxic coordinates. 5th edn. San Diego. Elsevier Academic Press; 2005.
- Pillon B, Ertle S, Deweer B, Bonnet AM, Vidailhet M, Dubois B. Memory for spatial location in 'de novo' parkinsonian patients. *Neuropsychologia* 1997; 35: 221–8.
- Polymenopoulos MH, Lavedan C, Leroy E, Ide SE, Dehejia A, Dutra A, et al. Mutation in the alpha-synuclein gene identified in families with Parkinson's disease. *Science* 1997; 276: 2045–7.
- Reynolds JN, Hyland BI, Wickens JR. A cellular mechanism of reward-related learning. *Nature* 2001; 413: 67–70.
- Rockenstein E, Nuber S, Overk CR, Ubhi K, Mante M, Patrick C, et al. Accumulation of oligomer-prone alpha-synuclein exacerbates synaptic and neuronal degeneration in vivo. *Brain* 2014; 137 (Pt 5): 1496–513.
- Rodo C, Sargolini F, Save E. Processing of spatial and non-spatial information in rats with lesions of the medial and lateral entorhinal cortex: environmental complexity matters. *Behav Brain Res* 2017; 320: 200–9.
- Royston P. A toolkit for testing for non-normality in complete and censored samples. *J R Stat Soc Ser D (Stat)* 1993; 42: 37–43.
- Sciamanna G, Tassone A, Mandolesi G, Puglisi F, Ponterio G, Martella G, et al. Cholinergic dysfunction alters synaptic integration between thalamostriatal and corticostriatal inputs in DYT1 dystonia. *J Neurosci* 2012; 32: 11991–2004.
- Shen W, Flajolet M, Greengard P, Surmeier DJ. Dichotomous dopaminergic control of striatal synaptic plasticity. *Science* 2008; 321: 848–51.
- Smeal RM, Gaspar RC, Keefe KA, Wilcox KS. A rat brain slice preparation for characterizing both thalamostriatal and corticostriatal afferents. *J Neurosci Methods* 2007; 159: 224–35.
- Smith Y, Raju DV, Pare JF, Sidibe M. The thalamostriatal system: a highly specific network of the basal ganglia circuitry. *Trends Neurosci* 2004; 27: 520–7.
- Smith Y, Surmeier DJ, Redgrave P, Kimura M. Thalamic contributions to Basal Ganglia-related behavioral switching and reinforcement. *J Neurosci* 2011; 31: 16102–6.
- Spencer B, Valera E, Rockenstein E, Overk C, Mante M, Adame A, et al. Anti-alpha-synuclein immunotherapy reduces alpha-synuclein propagation in the axon and degeneration in a combined viral vector and transgenic model of synucleinopathy. *Acta Neuropathol Commun* 2017; 5: 7.
- Spillantini MG, Goedert M. Synucleinopathies: past, present and future. *Neuropathol Appl Neurobiol* 2016; 42: 3–5.
- Spillantini MG, Schmidt ML, Lee VM, Trojanowski JQ, Jakes R, Goedert M. Alpha-synuclein in Lewy bodies. *Nature* 1997; 388: 839–40.
- Tanaka M, Kim YM, Lee G, Junn E, Iwatsubo T, Mouradian MM. Aggregates formed by alpha-synuclein and synphilin-1 are cytoprotective. *J Biol Chem* 2004; 279: 4625–31.
- Tozzi A, de Iure A, Bagetta V, Tantucci M, Durante V, Quiroga-Varela A, et al. Alpha-synuclein produces early behavioral alterations via striatal cholinergic synaptic dysfunction by interacting with GluN2D N-methyl-D-aspartate receptor subunit. *Biol Psychiatry* 2016; 79: 402–14.
- Vaikath NN, Majbour NK, Paleologou KE, Ardah MT, van Dam E, van de Berg WD, et al. Generation and characterization of novel conformation-specific monoclonal antibodies for alpha-synuclein pathology. *Neurobiol Dis* 2015; 79: 81–99.
- Vastagh C, Gardoni F, Bagetta V, Stanic J, Zianni E, Giampa C, et al. N-methyl-D-aspartate (NMDA) receptor composition modulates dendritic spine morphology in striatal medium spiny neurons. *J Biol Chem* 2012; 287: 18103–14.
- Vekrellis K, Xilouri M, Emmanouilidou E, Rideout HJ, Stefanis L. Pathological roles of alpha-synuclein in neurological disorders. *Lancet Neurol* 2011; 10: 1015–25.
- Winner B, Jappelli R, Maji SK, Desplats PA, Boyer L, Aigner S, et al. In vivo demonstration that alpha-synuclein oligomers are toxic. *Proc Natl Acad Sci USA* 2011; 108: 4194–9.
- Wong YC, Krainc D. Alpha-synuclein toxicity in neurodegeneration: mechanism and therapeutic strategies. *Nat Med* 2017; 23: 1–13.
- Wu YW, Kim JI, Tawfik VL, Lalchandani RR, Scherrer G, Ding JB. Input- and cell-type-specific endocannabinoid-dependent LTD in the striatum. *Cell Rep* 2015; 10: 75–87.
